**S6 Table. Jaguar density estimation with non-spatial and spatially-explicit models.**

|                                                     | Site              |                   |                  |                 |
|-----------------------------------------------------|-------------------|-------------------|------------------|-----------------|
|                                                     | Lorocachi         | Tiputini          | Keweriono        | Maxus Road      |
| $\hat{N}/ETA$                                       |                   |                   |                  |                 |
| Capture probability, $\hat{p}$                      | 0.05              | 0.04              | 0.05             | 0.08            |
| Closure test, $P$                                   | 0.92              | 0.07              | 0.31             | 0.75            |
| $\hat{N} \pm SE$                                    | 19 $\pm$ 5.3      | 7 $\pm$ 2.9       | 10 $\pm$ 4.7     | 3 $\pm$ 1.2     |
| $ETA$ (km <sup>2</sup> )                            | 486               | 467               | 458              | 463             |
| $D_{\hat{N}/ETA}$ (n/100 km <sup>2</sup> ) $\pm$ SE | 3.91 $\pm$ 1.11   | 1.50 $\pm$ 0.63   | 2.18 $\pm$ 1.04  | 0.65 $\pm$ 0.26 |
| $CV$ (%) of $D$                                     | 28.4              | 42.0              | 47.8             | 40.0            |
| <b>Bayesian-SECR</b>                                |                   |                   |                  |                 |
| $S$                                                 | 1681              | 1663              | 1557             | 1671            |
| $M$                                                 | 260               | 240               | 320              | 120             |
| $N_{super}$                                         | 92.04 $\pm$ 34.56 | 22.39 $\pm$ 23.39 | 12.45 $\pm$ 4.35 | 4.73 $\pm$ 4.12 |
| $D_{SECR}$ (n/100 km <sup>2</sup> ) $\pm$ SD        | 5.44 $\pm$ 2.04   | 1.49 $\pm$ 1.55   | 0.89 $\pm$ 0.31  | 0.29 $\pm$ 0.26 |
| $CV$ (%) of $D$                                     | 37.5              | 104.0             | 35.2             | 86.2            |

$\hat{N}$  = population size estimated with program CAPTURE (Model  $M_h$ );  $ETA$  = effective trapping area;  $D$  = density;  $S$  = state-space, including pixels with non-suitable habitat for jaguar;  $M$  = number of individuals used for data augmentation;  $N_{super}$  = estimated population in  $S$ ;  $CV$  = coefficient of variation.
