# Supplementary material for: When roads appear jaguars decline: Increased access to an Amazonian wilderness area reduces potential for jaguar conservation
Source: PLoS One. 2018 Jan 3;13(1):e0189740. doi: 10.1371/journal.pone.0189740 (PMC5751993; doi:10.1371/journal.pone.0189740)
Supplement: S2 Data — (XLSX) [file pone.0189740.s003.xlsx]

## Sheet: SECR-Lorocachi
Data for SECR analysis*: Tiputini site
*Data is in the format required to be used with R Package SPACECAP
Capture history matrix					Potential home rance centers matrix					Trap deployment matrix
LOC_ID	ANIMAL_ID	SO			X_COORD	Y_COORD	HABITAT			LOC_ID	X_COORD	Y_COORD	1	2	3	4	5	6	7	8	9	10	11	12	13	14	15	16	17	18	19	20	21	22	23	24	25	26	27	28	29	30	31	32	33	34	35	36	37
25	1	16			380328	9786627	1			1	389386	9819019	1	1	1	1	1	1	1	1	1	1	1	1	1	1	1	1	1	1	1	1	1	1	1	1	1	1	1	1	1	1	1	1	1	1	1	1	1
24	1	20			381328	9786627	1			2	391417	9819818	1	1	1	1	1	1	1	1	1	1	1	1	1	1	1	1	1	1	1	1	1	1	1	1	1	1	1	1	1	1	1	1	1	1	1	1	1
16	1	23			382328	9786627	1			3	386416	9818045	1	1	1	1	1	1	1	1	1	1	1	1	1	1	1	1	1	1	1	1	1	1	1	1	1	1	1	1	1	1	1	1	1	1	1	1	1
26	1	63			383328	9786627	1			4	388678	9816877	1	1	1	1	1	1	1	1	1	1	1	1	1	1	1	1	1	1	1	1	1	1	1	1	1	1	1	1	1	1	1	1	1	1	1	1	1
26	2	14			384328	9786627	1			5	391367	9817310	1	1	1	1	1	1	1	1	1	1	1	1	1	1	1	1	1	1	1	1	1	1	1	1	1	1	1	1	1	1	1	1	1	1	1	1	1
6	3	23			385328	9786627	1			6	383828	9815350	0	1	1	1	1	1	1	1	1	1	1	1	1	1	1	1	1	1	1	1	1	1	1	1	1	1	1	1	1	1	1	1	1	1	1	1	1
14	4	5			386328	9786627	1			7	385960	9815012	0	1	1	1	1	1	1	1	1	1	1	1	1	1	1	1	1	1	1	1	1	1	1	1	1	1	1	1	1	1	1	1	1	1	1	1	1
8	4	68			387328	9786627	1			8	388063	9814716	1	1	1	1	1	1	1	1	1	1	1	1	1	1	1	1	1	1	1	1	1	1	1	1	1	1	1	1	1	1	1	1	1	1	1	1	1
18	5	16			388328	9786627	1			9	389849	9814997	1	1	1	1	1	1	1	1	1	1	1	1	1	1	1	1	1	1	1	1	1	1	1	1	1	1	1	1	1	1	1	1	1	1	1	1	1
15	5	29			389328	9786627	1			10	392331	9814414	1	1	1	1	1	1	1	1	1	1	1	1	1	1	1	1	1	1	1	1	1	1	1	1	1	1	1	1	1	1	1	1	1	1	1	1	1
24	5	30			390328	9786627	1			11	389818	9813108	1	1	1	1	1	1	1	1	1	1	1	1	1	1	1	1	1	1	1	1	1	1	1	1	1	1	1	1	1	1	1	1	1	1	1	1	1
16	5	87			391328	9786627	1			12	392221	9812288	1	1	1	1	1	1	1	1	1	1	1	1	1	1	1	1	1	1	1	1	1	1	1	1	1	1	1	1	1	1	1	1	1	1	1	1	1
24	6	6			392328	9786627	1			13	384297	9811415	1	1	1	1	1	1	1	1	1	1	1	1	1	1	1	1	1	1	1	1	1	1	1	1	1	1	1	1	1	1	1	1	1	1	1	1	1
26	6	25			393328	9786627	1			14	387425	9812269	1	1	1	1	1	1	1	1	1	1	1	1	1	1	1	1	1	1	1	1	1	1	1	1	1	1	1	1	1	1	1	1	1	1	1	1	1
26	6	34			394328	9786627	1			15	385027	9809305	1	1	1	1	1	1	1	1	1	1	1	1	1	1	1	1	1	1	1	1	1	1	1	1	1	1	1	1	1	1	1	1	0	0	1	1	1
26	6	77			395328	9786627	1			16	386898	9810117	1	1	1	1	1	1	1	1	1	1	1	1	1	1	1	1	1	1	1	1	1	1	1	1	1	1	1	1	1	1	1	1	1	1	1	1	1
23	6	88			377328	9787627	1			17	389646	9810184	1	1	1	1	1	1	1	1	1	1	1	1	1	1	1	1	1	1	1	1	1	1	1	1	1	1	1	1	1	1	1	1	1	1	1	1	1
7	7	24			378328	9787627	1			18	386887	9807964	1	1	1	1	1	1	1	1	1	1	1	1	1	1	1	1	1	1	1	1	1	1	1	1	1	1	1	1	1	1	1	1	1	1	1	1	1
17	8	21			379328	9787627	1			19	389134	9808315	1	1	1	1	1	1	1	1	1	1	1	1	1	1	1	1	1	1	1	1	1	1	1	1	1	1	1	1	1	1	1	1	1	1	1	1	1
17	8	51			380328	9787627	1			20	384510	9806517	1	1	1	1	1	1	1	1	1	1	1	1	1	1	1	1	1	1	1	1	1	1	1	1	1	1	1	1	1	1	1	1	1	1	1	1	1
23	9	44			381328	9787627	1			21	389127	9806010	1	1	1	1	1	1	1	1	1	1	1	1	1	1	1	1	1	1	1	1	1	1	1	1	1	1	1	1	1	1	1	1	1	1	1	1	1
26	9	48			382328	9787627	1			22	391151	9807066	1	1	1	1	1	1	1	1	1	1	1	1	1	1	1	1	1	1	1	1	1	1	1	1	1	1	1	1	1	1	1	1	1	1	1	1	1
23	9	56			383328	9787627	1			23	384594	9804499	1	1	1	1	1	1	1	1	1	1	1	1	1	1	1	1	1	1	0	1	1	1	1	1	1	1	1	1	0	0	0	0	0	0	0	1	1
26	9	84			384328	9787627	1			24	386874	9805591	1	1	1	1	1	1	1	1	1	1	1	1	1	1	1	1	1	1	1	1	1	1	1	1	1	1	1	1	1	1	1	1	1	1	1	1	1
23	10	81			385328	9787627	1			25	386822	9803332	1	1	1	1	1	1	1	1	1	1	1	1	1	1	1	1	1	1	1	1	1	1	1	1	1	1	1	1	1	1	1	1	1	1	1	1	1
21	11	42			386328	9787627	1			26	386887	9801127	1	1	1	1	1	1	1	1	1	1	1	1	1	1	0	0	0	1	1	1	1	1	1	1	1	1	1	1	1	1	1	1	1	1	1	1	1
16	12	66			387328	9787627	1
5	13	25			388328	9787627	1
					389328	9787627	1
					390328	9787627	1
					391328	9787627	1
					392328	9787627	1
					393328	9787627	1
					394328	9787627	1
					395328	9787627	1
					396328	9787627	1
					397328	9787627	1
					398328	9787627	1
					376328	9788627	1
					377328	9788627	1
					378328	9788627	1
					379328	9788627	1
					380328	9788627	1
					381328	9788627	1
					382328	9788627	1
					383328	9788627	1
					384328	9788627	1
					385328	9788627	1
					386328	9788627	1
					387328	9788627	1
					388328	9788627	1
					389328	9788627	1
					390328	9788627	1
					391328	9788627	1
					392328	9788627	1
					393328	9788627	1
					394328	9788627	1
					395328	9788627	1
					396328	9788627	1
					397328	9788627	1
					398328	9788627	1
					399328	9788627	1
					400328	9788627	1
					374328	9789627	1
					375328	9789627	1
					376328	9789627	1
					377328	9789627	1
					378328	9789627	1
					379328	9789627	1
					380328	9789627	1
					381328	9789627	1
					382328	9789627	1
					383328	9789627	1
					384328	9789627	1
					385328	9789627	1
					386328	9789627	1
					387328	9789627	1
					388328	9789627	1
					389328	9789627	1
					390328	9789627	1
					391328	9789627	1
					392328	9789627	1
					393328	9789627	1
					394328	9789627	1
					395328	9789627	1
					396328	9789627	1
					397328	9789627	1
					398328	9789627	1
					399328	9789627	1
					400328	9789627	1
					401328	9789627	1
					373328	9790627	1
					374328	9790627	1
					375328	9790627	1
					376328	9790627	1
					377328	9790627	1
					378328	9790627	1
					379328	9790627	1
					380328	9790627	1
					381328	9790627	1
					382328	9790627	1
					383328	9790627	1
					384328	9790627	1
					385328	9790627	1
					386328	9790627	1
					387328	9790627	1
					388328	9790627	1
					389328	9790627	1
					390328	9790627	1
					391328	9790627	1
					392328	9790627	1
					393328	9790627	1
					394328	9790627	1
					395328	9790627	1
					396328	9790627	1
					397328	9790627	1
					398328	9790627	1
					399328	9790627	1
					400328	9790627	1
					401328	9790627	1
					402328	9790627	1
					372328	9791627	1
					373328	9791627	1
					374328	9791627	1
					375328	9791627	1
					376328	9791627	1
					377328	9791627	1
					378328	9791627	1
					379328	9791627	1
					380328	9791627	1
					381328	9791627	1
					382328	9791627	1
					383328	9791627	1
					384328	9791627	1
					385328	9791627	1
					386328	9791627	1
					387328	9791627	1
					388328	9791627	1
					389328	9791627	1
					390328	9791627	1
					391328	9791627	1
					392328	9791627	1
					393328	9791627	1
					394328	9791627	1
					395328	9791627	1
					396328	9791627	1
					397328	9791627	1
					398328	9791627	1
					399328	9791627	1
					400328	9791627	1
					401328	9791627	1
					402328	9791627	1
					403328	9791627	1
					372328	9792627	1
					373328	9792627	1
					374328	9792627	1
					375328	9792627	1
					376328	9792627	1
					377328	9792627	1
					378328	9792627	1
					379328	9792627	1
					380328	9792627	1
					381328	9792627	1
					382328	9792627	1
					383328	9792627	1
					384328	9792627	1
					385328	9792627	1
					386328	9792627	1
					387328	9792627	1
					388328	9792627	1
					389328	9792627	1
					390328	9792627	1
					391328	9792627	1
					392328	9792627	1
					393328	9792627	1
					394328	9792627	1
					395328	9792627	1
					396328	9792627	1
					397328	9792627	1
					398328	9792627	1
					399328	9792627	1
					400328	9792627	1
					401328	9792627	1
					402328	9792627	1
					403328	9792627	1
					404328	9792627	1
					371328	9793627	1
					372328	9793627	1
					373328	9793627	1
					374328	9793627	1
					375328	9793627	1
					376328	9793627	1
					377328	9793627	1
					378328	9793627	1
					379328	9793627	1
					380328	9793627	1
					381328	9793627	1
					382328	9793627	1
					383328	9793627	1
					384328	9793627	1
					385328	9793627	1
					386328	9793627	1
					387328	9793627	1
					388328	9793627	1
					389328	9793627	1
					390328	9793627	1
					391328	9793627	1
					392328	9793627	1
					393328	9793627	1
					394328	9793627	1
					395328	9793627	1
					396328	9793627	1
					397328	9793627	1
					398328	9793627	1
					399328	9793627	1
					400328	9793627	1
					401328	9793627	1
					402328	9793627	1
					403328	9793627	1
					404328	9793627	1
					370328	9794627	1
					371328	9794627	1
					372328	9794627	1
					373328	9794627	1
					374328	9794627	1
					375328	9794627	1
					376328	9794627	1
					377328	9794627	1
					378328	9794627	1
					379328	9794627	1
					380328	9794627	1
					381328	9794627	1
					382328	9794627	1
					383328	9794627	1
					384328	9794627	1
					385328	9794627	1
					386328	9794627	1
					387328	9794627	1
					388328	9794627	1
					389328	9794627	1
					390328	9794627	1
					391328	9794627	1
					392328	9794627	1
					393328	9794627	1
					394328	9794627	1
					395328	9794627	1
					396328	9794627	1
					397328	9794627	1
					398328	9794627	1
					399328	9794627	1
					400328	9794627	1
					401328	9794627	1
					402328	9794627	1
					403328	9794627	1
					404328	9794627	1
					405328	9794627	1
					370328	9795627	1
					371328	9795627	1
					372328	9795627	1
					373328	9795627	1
					374328	9795627	1
					375328	9795627	1
					376328	9795627	1
					377328	9795627	1
					378328	9795627	1
					379328	9795627	1
					380328	9795627	1
					381328	9795627	1
					382328	9795627	1
					383328	9795627	1
					384328	9795627	1
					385328	9795627	1
					386328	9795627	1
					387328	9795627	1
					388328	9795627	1
					389328	9795627	1
					390328	9795627	1
					391328	9795627	1
					392328	9795627	1
					393328	9795627	1
					394328	9795627	1
					395328	9795627	1
					396328	9795627	1
					397328	9795627	1
					398328	9795627	1
					399328	9795627	1
					400328	9795627	1
					401328	9795627	1
					402328	9795627	1
					403328	9795627	1
					404328	9795627	1
					405328	9795627	1
					370328	9796627	1
					371328	9796627	1
					372328	9796627	1
					373328	9796627	1
					374328	9796627	1
					375328	9796627	1
					376328	9796627	1
					377328	9796627	1
					378328	9796627	1
					379328	9796627	1
					380328	9796627	1
					381328	9796627	1
					382328	9796627	1
					383328	9796627	1
					384328	9796627	1
					385328	9796627	1
					386328	9796627	1
					387328	9796627	1
					388328	9796627	1
					389328	9796627	1
					390328	9796627	1
					391328	9796627	1
					392328	9796627	1
					393328	9796627	1
					394328	9796627	1
					395328	9796627	1
					396328	9796627	1
					397328	9796627	1
					398328	9796627	1
					399328	9796627	1
					400328	9796627	1
					401328	9796627	1
					402328	9796627	1
					403328	9796627	1
					404328	9796627	1
					405328	9796627	1
					406328	9796627	1
					369328	9797627	1
					370328	9797627	1
					371328	9797627	1
					372328	9797627	1
					373328	9797627	1
					374328	9797627	1
					375328	9797627	1
					376328	9797627	1
					377328	9797627	1
					378328	9797627	1
					379328	9797627	1
					380328	9797627	1
					381328	9797627	1
					382328	9797627	1
					383328	9797627	1
					384328	9797627	1
					385328	9797627	1
					386328	9797627	1
					387328	9797627	1
					388328	9797627	1
					389328	9797627	1
					390328	9797627	1
					391328	9797627	1
					392328	9797627	1
					393328	9797627	1
					394328	9797627	1
					395328	9797627	1
					396328	9797627	1
					397328	9797627	1
					398328	9797627	1
					399328	9797627	1
					400328	9797627	1
					401328	9797627	1
					402328	9797627	1
					403328	9797627	1
					404328	9797627	1
					405328	9797627	1
					406328	9797627	1
					369328	9798627	1
					370328	9798627	1
					371328	9798627	1
					372328	9798627	1
					373328	9798627	1
					374328	9798627	1
					375328	9798627	1
					376328	9798627	1
					377328	9798627	1
					378328	9798627	1
					379328	9798627	1
					380328	9798627	1
					381328	9798627	1
					382328	9798627	1
					383328	9798627	1
					384328	9798627	1
					385328	9798627	1
					386328	9798627	1
					387328	9798627	1
					388328	9798627	1
					389328	9798627	1
					390328	9798627	1
					391328	9798627	1
					392328	9798627	1
					393328	9798627	1
					394328	9798627	1
					395328	9798627	1
					396328	9798627	1
					397328	9798627	1
					398328	9798627	1
					399328	9798627	1
					400328	9798627	1
					401328	9798627	1
					402328	9798627	1
					403328	9798627	1
					404328	9798627	1
					405328	9798627	1
					406328	9798627	1
					369328	9799627	1
					370328	9799627	1
					371328	9799627	1
					372328	9799627	1
					373328	9799627	1
					374328	9799627	1
					375328	9799627	1
					376328	9799627	1
					377328	9799627	1
					378328	9799627	1
					379328	9799627	1
					380328	9799627	1
					381328	9799627	1
					382328	9799627	1
					383328	9799627	1
					384328	9799627	1
					385328	9799627	1
					386328	9799627	1
					387328	9799627	1
					388328	9799627	1
					389328	9799627	1
					390328	9799627	1
					391328	9799627	1
					392328	9799627	1
					393328	9799627	1
					394328	9799627	1
					395328	9799627	1
					396328	9799627	1
					397328	9799627	1
					398328	9799627	1
					399328	9799627	1
					400328	9799627	1
					401328	9799627	1
					402328	9799627	1
					403328	9799627	1
					404328	9799627	1
					405328	9799627	1
					406328	9799627	1
					369328	9800627	1
					370328	9800627	1
					371328	9800627	1
					372328	9800627	1
					373328	9800627	1
					374328	9800627	1
					375328	9800627	1
					376328	9800627	1
					377328	9800627	1
					378328	9800627	1
					379328	9800627	1
					380328	9800627	1
					381328	9800627	1
					382328	9800627	1
					383328	9800627	1
					384328	9800627	1
					385328	9800627	1
					386328	9800627	1
					387328	9800627	1
					388328	9800627	1
					389328	9800627	1
					390328	9800627	1
					391328	9800627	1
					392328	9800627	1
					393328	9800627	1
					394328	9800627	1
					395328	9800627	1
					396328	9800627	1
					397328	9800627	1
					398328	9800627	1
					399328	9800627	1
					400328	9800627	1
					401328	9800627	1
					402328	9800627	1
					403328	9800627	1
					404328	9800627	1
					405328	9800627	1
					406328	9800627	1
					369328	9801627	1
					370328	9801627	1
					371328	9801627	1
					372328	9801627	1
					373328	9801627	1
					374328	9801627	1
					375328	9801627	1
					376328	9801627	1
					377328	9801627	1
					378328	9801627	1
					379328	9801627	1
					380328	9801627	1
					381328	9801627	1
					382328	9801627	1
					383328	9801627	1
					384328	9801627	1
					385328	9801627	1
					386328	9801627	1
					387328	9801627	1
					388328	9801627	1
					389328	9801627	1
					390328	9801627	1
					391328	9801627	1
					392328	9801627	1
					393328	9801627	1
					394328	9801627	1
					395328	9801627	1
					396328	9801627	1
					397328	9801627	1
					398328	9801627	1
					399328	9801627	1
					400328	9801627	1
					401328	9801627	1
					402328	9801627	1
					403328	9801627	1
					404328	9801627	1
					405328	9801627	1
					406328	9801627	1
					407328	9801627	1
					369328	9802627	1
					370328	9802627	1
					371328	9802627	1
					372328	9802627	1
					373328	9802627	1
					374328	9802627	1
					375328	9802627	1
					376328	9802627	1
					377328	9802627	1
					378328	9802627	1
					379328	9802627	1
					380328	9802627	1
					381328	9802627	1
					382328	9802627	1
					383328	9802627	1
					384328	9802627	1
					385328	9802627	1
					386328	9802627	1
					387328	9802627	1
					388328	9802627	1
					389328	9802627	1
					390328	9802627	1
					391328	9802627	1
					392328	9802627	1
					393328	9802627	1
					394328	9802627	1
					395328	9802627	1
					396328	9802627	1
					397328	9802627	1
					398328	9802627	1
					399328	9802627	1
					400328	9802627	1
					401328	9802627	1
					402328	9802627	1
					403328	9802627	1
					404328	9802627	1
					405328	9802627	1
					406328	9802627	1
					407328	9802627	1
					369328	9803627	1
					370328	9803627	1
					371328	9803627	1
					372328	9803627	1
					373328	9803627	1
					374328	9803627	1
					375328	9803627	1
					376328	9803627	1
					377328	9803627	1
					378328	9803627	1
					379328	9803627	1
					380328	9803627	1
					381328	9803627	1
					382328	9803627	1
					383328	9803627	1
					384328	9803627	1
					385328	9803627	1
					386328	9803627	1
					387328	9803627	1
					388328	9803627	1
					389328	9803627	1
					390328	9803627	1
					391328	9803627	1
					392328	9803627	1
					393328	9803627	1
					394328	9803627	1
					395328	9803627	1
					396328	9803627	1
					397328	9803627	1
					398328	9803627	1
					399328	9803627	1
					400328	9803627	1
					401328	9803627	1
					402328	9803627	1
					403328	9803627	1
					404328	9803627	1
					405328	9803627	1
					406328	9803627	1
					407328	9803627	1
					369328	9804627	1
					370328	9804627	1
					371328	9804627	1
					372328	9804627	1
					373328	9804627	1
					374328	9804627	1
					375328	9804627	1
					376328	9804627	1
					377328	9804627	1
					378328	9804627	1
					379328	9804627	1
					380328	9804627	1
					381328	9804627	1
					382328	9804627	1
					383328	9804627	1
					384328	9804627	1
					385328	9804627	1
					386328	9804627	1
					387328	9804627	1
					388328	9804627	1
					389328	9804627	1
					390328	9804627	1
					391328	9804627	1
					392328	9804627	1
					393328	9804627	1
					394328	9804627	1
					395328	9804627	1
					396328	9804627	1
					397328	9804627	1
					398328	9804627	1
					399328	9804627	1
					400328	9804627	1
					401328	9804627	1
					402328	9804627	1
					403328	9804627	1
					404328	9804627	1
					405328	9804627	1
					406328	9804627	1
					407328	9804627	1
					369328	9805627	1
					370328	9805627	1
					371328	9805627	1
					372328	9805627	1
					373328	9805627	1
					374328	9805627	1
					375328	9805627	1
					376328	9805627	1
					377328	9805627	1
					378328	9805627	1
					379328	9805627	1
					380328	9805627	1
					381328	9805627	1
					382328	9805627	1
					383328	9805627	1
					384328	9805627	1
					385328	9805627	1
					386328	9805627	1
					387328	9805627	1
					388328	9805627	1
					389328	9805627	1
					390328	9805627	1
					391328	9805627	1
					392328	9805627	1
					393328	9805627	1
					394328	9805627	1
					395328	9805627	1
					396328	9805627	1
					397328	9805627	1
					398328	9805627	1
					399328	9805627	1
					400328	9805627	1
					401328	9805627	1
					402328	9805627	1
					403328	9805627	1
					404328	9805627	1
					405328	9805627	1
					406328	9805627	1
					407328	9805627	1
					369328	9806627	1
					370328	9806627	1
					371328	9806627	1
					372328	9806627	1
					373328	9806627	1
					374328	9806627	1
					375328	9806627	1
					376328	9806627	1
					377328	9806627	1
					378328	9806627	1
					379328	9806627	1
					380328	9806627	1
					381328	9806627	1
					382328	9806627	1
					383328	9806627	1
					384328	9806627	1
					385328	9806627	1
					386328	9806627	1
					387328	9806627	1
					388328	9806627	1
					389328	9806627	1
					390328	9806627	1
					391328	9806627	1
					392328	9806627	1
					393328	9806627	1
					394328	9806627	1
					395328	9806627	1
					396328	9806627	1
					397328	9806627	1
					398328	9806627	1
					399328	9806627	1
					400328	9806627	1
					401328	9806627	1
					402328	9806627	1
					403328	9806627	1
					404328	9806627	1
					405328	9806627	1
					406328	9806627	1
					407328	9806627	1
					369328	9807627	1
					370328	9807627	1
					371328	9807627	1
					372328	9807627	1
					373328	9807627	1
					374328	9807627	1
					375328	9807627	1
					376328	9807627	1
					377328	9807627	1
					378328	9807627	1
					379328	9807627	1
					380328	9807627	1
					381328	9807627	1
					382328	9807627	1
					383328	9807627	1
					384328	9807627	1
					385328	9807627	1
					386328	9807627	1
					387328	9807627	1
					388328	9807627	1
					389328	9807627	1
					390328	9807627	1
					391328	9807627	1
					392328	9807627	1
					393328	9807627	1
					394328	9807627	1
					395328	9807627	1
					396328	9807627	1
					397328	9807627	1
					398328	9807627	1
					399328	9807627	1
					400328	9807627	1
					401328	9807627	1
					402328	9807627	1
					403328	9807627	1
					404328	9807627	1
					405328	9807627	1
					406328	9807627	1
					407328	9807627	1
					369328	9808627	1
					370328	9808627	1
					371328	9808627	1
					372328	9808627	1
					373328	9808627	1
					374328	9808627	1
					375328	9808627	1
					376328	9808627	1
					377328	9808627	1
					378328	9808627	1
					379328	9808627	1
					380328	9808627	1
					381328	9808627	1
					382328	9808627	1
					383328	9808627	1
					384328	9808627	1
					385328	9808627	1
					386328	9808627	1
					387328	9808627	1
					388328	9808627	1
					389328	9808627	1
					390328	9808627	1
					391328	9808627	1
					392328	9808627	1
					393328	9808627	1
					394328	9808627	1
					395328	9808627	1
					396328	9808627	1
					397328	9808627	1
					398328	9808627	1
					399328	9808627	1
					400328	9808627	1
					401328	9808627	1
					402328	9808627	1
					403328	9808627	1
					404328	9808627	1
					405328	9808627	1
					406328	9808627	1
					407328	9808627	1
					369328	9809627	1
					370328	9809627	1
					371328	9809627	1
					372328	9809627	1
					373328	9809627	1
					374328	9809627	1
					375328	9809627	1
					376328	9809627	1
					377328	9809627	1
					378328	9809627	1
					379328	9809627	1
					380328	9809627	1
					381328	9809627	1
					382328	9809627	1
					383328	9809627	1
					384328	9809627	1
					385328	9809627	1
					386328	9809627	1
					387328	9809627	1
					388328	9809627	1
					389328	9809627	1
					390328	9809627	1
					391328	9809627	1
					392328	9809627	1
					393328	9809627	1
					394328	9809627	1
					395328	9809627	1
					396328	9809627	1
					397328	9809627	1
					398328	9809627	1
					399328	9809627	1
					400328	9809627	1
					401328	9809627	1
					402328	9809627	1
					403328	9809627	1
					404328	9809627	1
					405328	9809627	1
					406328	9809627	1
					407328	9809627	1
					369328	9810627	1
					370328	9810627	1
					371328	9810627	1
					372328	9810627	1
					373328	9810627	1
					374328	9810627	1
					375328	9810627	1
					376328	9810627	1
					377328	9810627	1
					378328	9810627	1
					379328	9810627	1
					380328	9810627	1
					381328	9810627	1
					382328	9810627	1
					383328	9810627	1
					384328	9810627	1
					385328	9810627	1
					386328	9810627	1
					387328	9810627	1
					388328	9810627	1
					389328	9810627	1
					390328	9810627	1
					391328	9810627	1
					392328	9810627	1
					393328	9810627	1
					394328	9810627	1
					395328	9810627	1
					396328	9810627	1
					397328	9810627	1
					398328	9810627	1
					399328	9810627	1
					400328	9810627	1
					401328	9810627	1
					402328	9810627	1
					403328	9810627	1
					404328	9810627	1
					405328	9810627	1
					406328	9810627	1
					407328	9810627	1
					369328	9811627	1
					370328	9811627	1
					371328	9811627	1
					372328	9811627	1
					373328	9811627	1
					374328	9811627	1
					375328	9811627	1
					376328	9811627	1
					377328	9811627	1
					378328	9811627	1
					379328	9811627	1
					380328	9811627	1
					381328	9811627	1
					382328	9811627	1
					383328	9811627	1
					384328	9811627	1
					385328	9811627	1
					386328	9811627	1
					387328	9811627	1
					388328	9811627	1
					389328	9811627	1
					390328	9811627	1
					391328	9811627	1
					392328	9811627	1
					393328	9811627	1
					394328	9811627	1
					395328	9811627	1
					396328	9811627	1
					397328	9811627	1
					398328	9811627	1
					399328	9811627	1
					400328	9811627	1
					401328	9811627	1
					402328	9811627	1
					403328	9811627	1
					404328	9811627	1
					405328	9811627	1
					406328	9811627	1
					407328	9811627	1
					369328	9812627	1
					370328	9812627	1
					371328	9812627	1
					372328	9812627	1
					373328	9812627	1
					374328	9812627	1
					375328	9812627	1
					376328	9812627	1
					377328	9812627	1
					378328	9812627	1
					379328	9812627	1
					380328	9812627	1
					381328	9812627	1
					382328	9812627	1
					383328	9812627	1
					384328	9812627	1
					385328	9812627	1
					386328	9812627	1
					387328	9812627	1
					388328	9812627	1
					389328	9812627	1
					390328	9812627	1
					391328	9812627	1
					392328	9812627	1
					393328	9812627	1
					394328	9812627	1
					395328	9812627	1
					396328	9812627	1
					397328	9812627	1
					398328	9812627	1
					399328	9812627	1
					400328	9812627	1
					401328	9812627	1
					402328	9812627	1
					403328	9812627	1
					404328	9812627	1
					405328	9812627	1
					406328	9812627	1
					407328	9812627	1
					369328	9813627	1
					370328	9813627	1
					371328	9813627	1
					372328	9813627	1
					373328	9813627	1
					374328	9813627	1
					375328	9813627	1
					376328	9813627	1
					377328	9813627	1
					378328	9813627	1
					379328	9813627	1
					380328	9813627	1
					381328	9813627	1
					382328	9813627	1
					383328	9813627	1
					384328	9813627	1
					385328	9813627	1
					386328	9813627	1
					387328	9813627	1
					388328	9813627	1
					389328	9813627	1
					390328	9813627	1
					391328	9813627	1
					392328	9813627	1
					393328	9813627	1
					394328	9813627	1
					395328	9813627	1
					396328	9813627	1
					397328	9813627	1
					398328	9813627	1
					399328	9813627	1
					400328	9813627	1
					401328	9813627	1
					402328	9813627	1
					403328	9813627	1
					404328	9813627	1
					405328	9813627	1
					406328	9813627	1
					407328	9813627	1
					369328	9814627	1
					370328	9814627	1
					371328	9814627	1
					372328	9814627	1
					373328	9814627	1
					374328	9814627	1
					375328	9814627	1
					376328	9814627	1
					377328	9814627	1
					378328	9814627	1
					379328	9814627	1
					380328	9814627	1
					381328	9814627	1
					382328	9814627	1
					383328	9814627	1
					384328	9814627	1
					385328	9814627	1
					386328	9814627	1
					387328	9814627	1
					388328	9814627	1
					389328	9814627	1
					390328	9814627	1
					391328	9814627	1
					392328	9814627	1
					393328	9814627	1
					394328	9814627	1
					395328	9814627	1
					396328	9814627	1
					397328	9814627	1
					398328	9814627	1
					399328	9814627	1
					400328	9814627	1
					401328	9814627	1
					402328	9814627	1
					403328	9814627	1
					404328	9814627	1
					405328	9814627	1
					406328	9814627	1
					407328	9814627	1
					369328	9815627	1
					370328	9815627	1
					371328	9815627	1
					372328	9815627	1
					373328	9815627	1
					374328	9815627	1
					375328	9815627	1
					376328	9815627	1
					377328	9815627	1
					378328	9815627	1
					379328	9815627	1
					380328	9815627	1
					381328	9815627	1
					382328	9815627	1
					383328	9815627	1
					384328	9815627	1
					385328	9815627	1
					386328	9815627	1
					387328	9815627	1
					388328	9815627	1
					389328	9815627	1
					390328	9815627	1
					391328	9815627	1
					392328	9815627	1
					393328	9815627	1
					394328	9815627	1
					395328	9815627	1
					396328	9815627	1
					397328	9815627	1
					398328	9815627	1
					399328	9815627	1
					400328	9815627	1
					401328	9815627	1
					402328	9815627	1
					403328	9815627	1
					404328	9815627	1
					405328	9815627	1
					406328	9815627	1
					407328	9815627	1
					369328	9816627	1
					370328	9816627	1
					371328	9816627	1
					372328	9816627	1
					373328	9816627	1
					374328	9816627	1
					375328	9816627	1
					376328	9816627	1
					377328	9816627	1
					378328	9816627	1
					379328	9816627	1
					380328	9816627	1
					381328	9816627	1
					382328	9816627	1
					383328	9816627	1
					384328	9816627	1
					385328	9816627	1
					386328	9816627	1
					387328	9816627	1
					388328	9816627	1
					389328	9816627	1
					390328	9816627	1
					391328	9816627	1
					392328	9816627	1
					393328	9816627	1
					394328	9816627	1
					395328	9816627	1
					396328	9816627	1
					397328	9816627	1
					398328	9816627	1
					399328	9816627	1
					400328	9816627	1
					401328	9816627	1
					402328	9816627	1
					403328	9816627	1
					404328	9816627	1
					405328	9816627	1
					406328	9816627	1
					407328	9816627	1
					369328	9817627	1
					370328	9817627	1
					371328	9817627	1
					372328	9817627	1
					373328	9817627	1
					374328	9817627	1
					375328	9817627	1
					376328	9817627	1
					377328	9817627	1
					378328	9817627	1
					379328	9817627	1
					380328	9817627	1
					381328	9817627	1
					382328	9817627	1
					383328	9817627	1
					384328	9817627	1
					385328	9817627	1
					386328	9817627	1
					387328	9817627	1
					388328	9817627	1
					389328	9817627	1
					390328	9817627	1
					391328	9817627	1
					392328	9817627	1
					393328	9817627	1
					394328	9817627	1
					395328	9817627	1
					396328	9817627	1
					397328	9817627	1
					398328	9817627	1
					399328	9817627	1
					400328	9817627	1
					401328	9817627	1
					402328	9817627	1
					403328	9817627	1
					404328	9817627	1
					405328	9817627	1
					406328	9817627	1
					407328	9817627	1
					369328	9818627	1
					370328	9818627	1
					371328	9818627	1
					372328	9818627	1
					373328	9818627	1
					374328	9818627	1
					375328	9818627	1
					376328	9818627	1
					377328	9818627	1
					378328	9818627	1
					379328	9818627	1
					380328	9818627	1
					381328	9818627	1
					382328	9818627	1
					383328	9818627	1
					384328	9818627	1
					385328	9818627	1
					386328	9818627	1
					387328	9818627	1
					388328	9818627	1
					389328	9818627	1
					390328	9818627	1
					391328	9818627	1
					392328	9818627	1
					393328	9818627	1
					394328	9818627	1
					395328	9818627	1
					396328	9818627	1
					397328	9818627	1
					398328	9818627	1
					399328	9818627	1
					400328	9818627	1
					401328	9818627	1
					402328	9818627	1
					403328	9818627	1
					404328	9818627	1
					405328	9818627	1
					406328	9818627	1
					407328	9818627	1
					369328	9819627	1
					370328	9819627	1
					371328	9819627	1
					372328	9819627	1
					373328	9819627	1
					374328	9819627	1
					375328	9819627	1
					376328	9819627	1
					377328	9819627	1
					378328	9819627	1
					379328	9819627	1
					380328	9819627	1
					381328	9819627	1
					382328	9819627	1
					383328	9819627	1
					384328	9819627	1
					385328	9819627	1
					386328	9819627	1
					387328	9819627	1
					388328	9819627	1
					389328	9819627	1
					390328	9819627	1
					391328	9819627	1
					392328	9819627	1
					393328	9819627	1
					394328	9819627	1
					395328	9819627	1
					396328	9819627	1
					397328	9819627	1
					398328	9819627	1
					399328	9819627	1
					400328	9819627	1
					401328	9819627	1
					402328	9819627	1
					403328	9819627	1
					404328	9819627	1
					405328	9819627	1
					406328	9819627	1
					407328	9819627	1
					369328	9820627	1
					370328	9820627	1
					371328	9820627	1
					372328	9820627	1
					373328	9820627	1
					374328	9820627	1
					375328	9820627	1
					376328	9820627	1
					377328	9820627	1
					378328	9820627	1
					379328	9820627	1
					380328	9820627	1
					381328	9820627	1
					382328	9820627	1
					383328	9820627	1
					384328	9820627	1
					385328	9820627	1
					386328	9820627	1
					387328	9820627	1
					388328	9820627	1
					389328	9820627	1
					390328	9820627	1
					391328	9820627	1
					392328	9820627	1
					393328	9820627	1
					394328	9820627	1
					395328	9820627	1
					396328	9820627	1
					397328	9820627	1
					398328	9820627	1
					399328	9820627	1
					400328	9820627	1
					401328	9820627	1
					402328	9820627	1
					403328	9820627	1
					404328	9820627	1
					405328	9820627	1
					406328	9820627	1
					369328	9821627	1
					370328	9821627	1
					371328	9821627	1
					372328	9821627	1
					373328	9821627	1
					374328	9821627	1
					375328	9821627	1
					376328	9821627	1
					377328	9821627	1
					378328	9821627	1
					379328	9821627	1
					380328	9821627	1
					381328	9821627	1
					382328	9821627	1
					383328	9821627	1
					384328	9821627	1
					385328	9821627	1
					386328	9821627	1
					387328	9821627	1
					388328	9821627	1
					389328	9821627	1
					390328	9821627	1
					391328	9821627	1
					392328	9821627	1
					393328	9821627	1
					394328	9821627	1
					395328	9821627	1
					396328	9821627	1
					397328	9821627	1
					398328	9821627	1
					399328	9821627	1
					400328	9821627	1
					401328	9821627	1
					402328	9821627	1
					403328	9821627	1
					404328	9821627	1
					405328	9821627	1
					406328	9821627	1
					369328	9822627	1
					370328	9822627	1
					371328	9822627	1
					372328	9822627	1
					373328	9822627	1
					374328	9822627	1
					375328	9822627	1
					376328	9822627	1
					377328	9822627	1
					378328	9822627	1
					379328	9822627	1
					380328	9822627	1
					381328	9822627	1
					382328	9822627	1
					383328	9822627	1
					384328	9822627	1
					385328	9822627	1
					386328	9822627	1
					387328	9822627	1
					388328	9822627	1
					389328	9822627	1
					390328	9822627	1
					391328	9822627	1
					392328	9822627	1
					393328	9822627	1
					394328	9822627	1
					395328	9822627	1
					396328	9822627	1
					397328	9822627	1
					398328	9822627	1
					399328	9822627	1
					400328	9822627	1
					401328	9822627	1
					402328	9822627	1
					403328	9822627	1
					404328	9822627	1
					405328	9822627	1
					406328	9822627	1
					369328	9823627	1
					370328	9823627	1
					371328	9823627	1
					372328	9823627	1
					373328	9823627	1
					374328	9823627	1
					375328	9823627	1
					376328	9823627	1
					377328	9823627	1
					378328	9823627	1
					379328	9823627	1
					380328	9823627	1
					381328	9823627	1
					382328	9823627	1
					383328	9823627	1
					384328	9823627	1
					385328	9823627	1
					386328	9823627	1
					387328	9823627	1
					388328	9823627	1
					389328	9823627	1
					390328	9823627	1
					391328	9823627	1
					392328	9823627	1
					393328	9823627	1
					394328	9823627	1
					395328	9823627	1
					396328	9823627	1
					397328	9823627	1
					398328	9823627	1
					399328	9823627	1
					400328	9823627	1
					401328	9823627	1
					402328	9823627	1
					403328	9823627	1
					404328	9823627	1
					405328	9823627	1
					406328	9823627	1
					370328	9824627	1
					371328	9824627	1
					372328	9824627	1
					373328	9824627	1
					374328	9824627	1
					375328	9824627	1
					376328	9824627	1
					377328	9824627	1
					378328	9824627	1
					379328	9824627	1
					380328	9824627	1
					381328	9824627	1
					382328	9824627	1
					383328	9824627	1
					384328	9824627	1
					385328	9824627	1
					386328	9824627	1
					387328	9824627	1
					388328	9824627	1
					389328	9824627	1
					390328	9824627	1
					391328	9824627	1
					392328	9824627	1
					393328	9824627	1
					394328	9824627	1
					395328	9824627	1
					396328	9824627	1
					397328	9824627	1
					398328	9824627	1
					399328	9824627	1
					400328	9824627	1
					401328	9824627	1
					402328	9824627	1
					403328	9824627	1
					404328	9824627	1
					405328	9824627	1
					406328	9824627	1
					370328	9825627	1
					371328	9825627	1
					372328	9825627	1
					373328	9825627	1
					374328	9825627	1
					375328	9825627	1
					376328	9825627	1
					377328	9825627	1
					378328	9825627	1
					379328	9825627	1
					380328	9825627	1
					381328	9825627	1
					382328	9825627	1
					383328	9825627	1
					384328	9825627	1
					385328	9825627	1
					386328	9825627	1
					387328	9825627	1
					388328	9825627	1
					389328	9825627	1
					390328	9825627	1
					391328	9825627	1
					392328	9825627	1
					393328	9825627	1
					394328	9825627	1
					395328	9825627	1
					396328	9825627	1
					397328	9825627	1
					398328	9825627	1
					399328	9825627	1
					400328	9825627	1
					401328	9825627	1
					402328	9825627	1
					403328	9825627	1
					404328	9825627	1
					405328	9825627	1
					371328	9826627	1
					372328	9826627	1
					373328	9826627	1
					374328	9826627	1
					375328	9826627	1
					376328	9826627	1
					377328	9826627	1
					378328	9826627	1
					379328	9826627	1
					380328	9826627	1
					381328	9826627	1
					382328	9826627	1
					383328	9826627	1
					384328	9826627	1
					385328	9826627	1
					386328	9826627	1
					387328	9826627	1
					388328	9826627	1
					389328	9826627	1
					390328	9826627	1
					391328	9826627	1
					392328	9826627	1
					393328	9826627	1
					394328	9826627	1
					395328	9826627	1
					396328	9826627	1
					397328	9826627	1
					398328	9826627	1
					399328	9826627	1
					400328	9826627	1
					401328	9826627	1
					402328	9826627	1
					403328	9826627	1
					404328	9826627	1
					405328	9826627	1
					371328	9827627	1
					372328	9827627	1
					373328	9827627	1
					374328	9827627	1
					375328	9827627	1
					376328	9827627	1
					377328	9827627	1
					378328	9827627	1
					379328	9827627	1
					380328	9827627	1
					381328	9827627	1
					382328	9827627	1
					383328	9827627	1
					384328	9827627	1
					385328	9827627	1
					386328	9827627	1
					387328	9827627	1
					388328	9827627	1
					389328	9827627	1
					390328	9827627	1
					391328	9827627	1
					392328	9827627	1
					393328	9827627	1
					394328	9827627	1
					395328	9827627	1
					396328	9827627	1
					397328	9827627	1
					398328	9827627	1
					399328	9827627	1
					400328	9827627	1
					401328	9827627	1
					402328	9827627	1
					403328	9827627	1
					404328	9827627	1
					372328	9828627	1
					373328	9828627	1
					374328	9828627	1
					375328	9828627	1
					376328	9828627	1
					377328	9828627	1
					378328	9828627	1
					379328	9828627	1
					380328	9828627	1
					381328	9828627	1
					382328	9828627	1
					383328	9828627	1
					384328	9828627	1
					385328	9828627	1
					386328	9828627	1
					387328	9828627	1
					388328	9828627	1
					389328	9828627	1
					390328	9828627	1
					391328	9828627	1
					392328	9828627	1
					393328	9828627	1
					394328	9828627	1
					395328	9828627	1
					396328	9828627	1
					397328	9828627	1
					398328	9828627	1
					399328	9828627	1
					400328	9828627	1
					401328	9828627	1
					402328	9828627	1
					403328	9828627	1
					404328	9828627	1
					373328	9829627	1
					374328	9829627	1
					375328	9829627	1
					376328	9829627	1
					377328	9829627	1
					378328	9829627	1
					379328	9829627	1
					380328	9829627	1
					381328	9829627	1
					382328	9829627	1
					383328	9829627	1
					384328	9829627	1
					385328	9829627	1
					386328	9829627	1
					387328	9829627	1
					388328	9829627	1
					389328	9829627	1
					390328	9829627	1
					391328	9829627	1
					392328	9829627	1
					393328	9829627	1
					394328	9829627	1
					395328	9829627	1
					396328	9829627	1
					397328	9829627	1
					398328	9829627	1
					399328	9829627	1
					400328	9829627	1
					401328	9829627	1
					402328	9829627	1
					403328	9829627	1
					374328	9830627	1
					375328	9830627	1
					376328	9830627	1
					377328	9830627	1
					378328	9830627	1
					379328	9830627	1
					380328	9830627	1
					381328	9830627	1
					382328	9830627	1
					383328	9830627	1
					384328	9830627	1
					385328	9830627	1
					386328	9830627	1
					387328	9830627	1
					388328	9830627	1
					389328	9830627	1
					390328	9830627	1
					391328	9830627	1
					392328	9830627	1
					393328	9830627	1
					394328	9830627	1
					395328	9830627	1
					396328	9830627	1
					397328	9830627	1
					398328	9830627	1
					399328	9830627	1
					400328	9830627	1
					401328	9830627	1
					402328	9830627	1
					375328	9831627	1
					376328	9831627	1
					377328	9831627	1
					378328	9831627	1
					379328	9831627	1
					380328	9831627	1
					381328	9831627	1
					382328	9831627	1
					383328	9831627	1
					384328	9831627	1
					385328	9831627	1
					386328	9831627	1
					387328	9831627	1
					388328	9831627	1
					389328	9831627	1
					390328	9831627	1
					391328	9831627	1
					392328	9831627	1
					393328	9831627	1
					394328	9831627	1
					395328	9831627	1
					396328	9831627	1
					397328	9831627	1
					398328	9831627	1
					399328	9831627	1
					400328	9831627	1
					401328	9831627	1
					376328	9832627	1
					377328	9832627	1
					378328	9832627	1
					379328	9832627	1
					380328	9832627	1
					381328	9832627	1
					382328	9832627	1
					383328	9832627	1
					384328	9832627	1
					385328	9832627	1
					386328	9832627	1
					387328	9832627	1
					388328	9832627	1
					389328	9832627	1
					390328	9832627	1
					391328	9832627	1
					392328	9832627	1
					393328	9832627	1
					394328	9832627	1
					395328	9832627	1
					396328	9832627	1
					397328	9832627	1
					398328	9832627	1
					399328	9832627	1
					378328	9833627	1
					379328	9833627	1
					380328	9833627	1
					381328	9833627	1
					382328	9833627	1
					383328	9833627	1
					384328	9833627	1
					385328	9833627	1
					386328	9833627	1
					387328	9833627	1
					388328	9833627	1
					389328	9833627	1
					390328	9833627	1
					391328	9833627	1
					392328	9833627	1
					393328	9833627	1
					394328	9833627	1
					395328	9833627	1
					396328	9833627	1
					397328	9833627	1
					382328	9834627	1
					383328	9834627	1
					384328	9834627	1
					385328	9834627	1
					386328	9834627	1
					387328	9834627	1
					388328	9834627	1
					389328	9834627	1
					390328	9834627	1
					391328	9834627	1
					392328	9834627	1
					393328	9834627	1
					394328	9834627	1
[truncated: 53 more columns]

## Sheet: SECR-Tiputini
Data for SECR analysis*: Tiputini site
*Data is in the format required to be used with R Package SPACECAP
Capture history matrix					Potential home rance centers matrix					Trap deployment matrix
LOC_ID	ANIMAL_ID	SO			X_COORD	Y_COORD	HABITAT			LOC_ID	X_COORD	Y_COORD	1	2	3	4	5	6	7	8	9	10	11	12	13	14	15	16	17	18	19	20	21	22	23	24	25	26	27	28	29	30	31	32	33	34	35	36	37
15	1	38			377899	9901148	1			1	387533	9923459	1	1	1	1	1	1	1	1	1	1	1	1	1	1	1	1	1	1	1	1	1	1	1	1	1	1	1	1	1	1	1	1	0	0	0	0	0
2	1	52			378899	9901148	1			2	383945	9928319	1	1	1	1	1	1	1	1	1	1	1	1	1	1	1	1	1	0	0	0	0	0	0	0	0	0	0	0	0	0	0	0	0	0	1	1	1
9	2	1			379899	9901148	1			3	386117	9920673	1	1	1	1	1	1	1	1	1	1	0	0	0	0	0	1	1	1	1	1	1	1	1	1	1	1	1	1	1	0	0	0	0	0	0	0	0
21	2	2			380899	9901148	1			4	389304	9920537	1	1	1	1	1	1	1	1	1	1	1	1	1	1	1	1	1	1	1	1	1	1	1	0	0	0	0	0	0	0	0	0	0	0	0	1	1
9	3	49			381899	9901148	1			5	389424	9918404	1	1	1	1	1	1	1	1	1	1	1	1	1	1	1	1	1	1	1	1	1	1	1	1	1	1	1	1	1	1	1	1	1	1	1	1	1
19	4	81			382899	9901148	1			6	389553	9916160	1	1	1	1	1	1	1	1	1	1	1	1	1	1	1	1	1	1	1	1	1	1	1	1	1	1	1	1	1	1	1	1	1	0	0	1	1
20	4	84			383899	9901148	1			7	387294	9919093	1	1	1	1	1	1	1	1	1	1	1	1	1	1	1	1	1	1	1	1	1	1	1	1	1	1	1	1	1	1	1	1	1	1	1	1	1
16	5	67			384899	9901148	1			8	385230	9919080	1	1	1	1	1	1	1	1	1	1	1	1	1	1	1	1	1	1	1	1	1	1	1	1	1	1	1	1	1	1	1	1	1	1	1	1	1
15	6	90			385899	9901148	1			9	383798	9921431	1	1	1	1	1	1	1	1	1	1	1	0	0	0	0	1	1	1	1	1	1	1	0	0	0	0	0	0	0	0	0	0	0	0	0	0	0
					386899	9901148	1			10	385054	9922859	1	1	1	1	1	1	1	1	1	1	1	1	1	1	1	1	1	1	1	1	1	1	1	1	1	1	1	1	1	1	1	1	0	0	0	0	0
					387899	9901148	1			11	382138	9922873	0	0	0	0	0	0	0	0	0	0	0	0	0	0	0	1	1	1	1	1	1	1	1	1	1	1	1	1	1	1	1	1	1	1	1	1	1
					388899	9901148	1			12	391626	9921029	1	1	1	1	1	1	1	1	1	1	1	1	1	1	1	1	1	1	1	1	1	1	1	1	1	1	1	1	1	1	1	1	1	1	1	1	1
					389899	9901148	1			13	392261	9918502	1	1	1	1	1	1	1	1	1	1	1	1	1	1	1	1	1	1	1	1	0	0	0	0	0	0	0	0	0	0	0	0	0	0	0	0	0
					390899	9901148	1			14	392094	9916292	1	1	1	1	1	1	1	1	1	1	1	1	1	0	1	1	1	1	1	1	1	1	1	1	1	1	1	1	0	0	0	0	0	0	0	0	1
					391899	9901148	1			15	390043	9922513	1	1	1	1	1	1	1	1	1	1	1	1	1	1	1	1	1	1	1	1	1	1	1	1	1	1	1	1	1	1	1	1	1	1	1	1	1
					392899	9901148	1			16	389400	9923966	1	1	1	1	1	1	1	1	1	1	1	1	1	0	1	1	1	1	1	1	1	1	1	1	1	1	1	1	1	1	1	1	1	1	1	1	1
					393899	9901148	1			17	388928	9925629	1	1	1	1	1	1	1	1	1	1	1	0	0	0	1	1	1	1	1	1	1	1	1	1	1	1	1	1	1	1	1	1	1	1	1	1	1
					394899	9901148	1			18	386342	9925326	1	1	1	1	1	1	1	1	1	1	1	1	1	1	1	1	1	1	1	1	1	1	1	1	1	1	1	1	1	1	1	0	0	0	1	1	1
					395899	9901148	1			19	384077	9925648	1	1	1	1	1	1	1	1	1	1	1	1	1	1	1	1	1	1	1	1	1	1	1	1	1	1	1	1	1	1	1	1	1	1	1	1	1
					396899	9901148	1			20	381399	9925451	1	1	1	1	1	1	1	1	1	1	1	1	1	1	1	1	1	1	1	1	1	1	1	1	1	1	1	1	1	1	1	1	1	1	1	0	0
					397899	9901148	1			21	392292	9923872	1	1	1	1	1	1	1	1	1	1	1	1	1	1	1	1	1	1	1	1	1	1	1	1	1	1	1	1	1	1	1	1	0	0	0	0	0
					374899	9902148	1			22	391584	9926158	1	1	1	1	1	1	1	1	0	0	0	0	0	0	0	1	1	1	1	1	1	1	1	1	1	1	1	0	0	0	0	0	0	0	0	0	0
					375899	9902148	1			23	394921	9920352	1	1	1	1	1	1	1	1	1	1	1	1	1	1	1	1	1	1	1	1	1	1	1	1	1	1	1	1	1	1	1	1	1	1	1	1	1
					376899	9902148	1			24	394853	9918080	1	1	1	1	1	1	1	1	1	1	1	1	1	1	1	1	1	1	1	1	1	1	1	1	1	1	1	1	1	1	1	1	1	1	1	1	1
					377899	9902148	1			25	394795	9915648	1	1	1	1	1	1	1	1	1	1	1	1	0	0	1	1	1	1	1	1	1	1	1	1	1	1	1	1	0	0	0	0	0	0	0	0	0
					378899	9902148	1
					379899	9902148	1
					380899	9902148	1
					381899	9902148	1
					382899	9902148	1
					383899	9902148	1
					384899	9902148	1
					385899	9902148	1
					386899	9902148	1
					387899	9902148	1
					388899	9902148	1
					389899	9902148	1
					390899	9902148	1
					391899	9902148	1
					392899	9902148	1
					393899	9902148	1
					394899	9902148	1
					395899	9902148	1
					396899	9902148	1
					397899	9902148	1
					398899	9902148	1
					399899	9902148	1
					400899	9902148	1
					373899	9903148	1
					374899	9903148	1
					375899	9903148	1
					376899	9903148	1
					377899	9903148	1
					378899	9903148	1
					379899	9903148	1
					380899	9903148	1
					381899	9903148	1
					382899	9903148	1
					383899	9903148	1
					384899	9903148	1
					385899	9903148	1
					386899	9903148	1
					387899	9903148	1
					388899	9903148	1
					389899	9903148	1
					390899	9903148	1
					391899	9903148	1
					392899	9903148	1
					393899	9903148	1
					394899	9903148	1
					395899	9903148	1
					396899	9903148	1
					397899	9903148	1
					398899	9903148	1
					399899	9903148	1
					400899	9903148	1
					401899	9903148	1
					402899	9903148	1
					371899	9904148	1
					372899	9904148	1
					373899	9904148	1
					374899	9904148	1
					375899	9904148	1
					376899	9904148	1
					377899	9904148	1
					378899	9904148	1
					379899	9904148	1
					380899	9904148	1
					381899	9904148	1
					382899	9904148	1
					383899	9904148	1
					384899	9904148	1
					385899	9904148	1
					386899	9904148	1
					387899	9904148	1
					388899	9904148	1
					389899	9904148	1
					390899	9904148	1
					391899	9904148	1
					392899	9904148	1
					393899	9904148	1
					394899	9904148	1
					395899	9904148	1
					396899	9904148	1
					397899	9904148	1
					398899	9904148	1
					399899	9904148	1
					400899	9904148	1
					401899	9904148	1
					402899	9904148	1
					403899	9904148	1
					370899	9905148	1
					371899	9905148	1
					372899	9905148	1
					373899	9905148	1
					374899	9905148	1
					375899	9905148	1
					376899	9905148	1
					377899	9905148	1
					378899	9905148	1
					379899	9905148	1
					380899	9905148	1
					381899	9905148	1
					382899	9905148	1
					383899	9905148	1
					384899	9905148	1
					385899	9905148	1
					386899	9905148	1
					387899	9905148	1
					388899	9905148	1
					389899	9905148	1
					390899	9905148	1
					391899	9905148	1
					392899	9905148	1
					393899	9905148	1
					394899	9905148	1
					395899	9905148	1
					396899	9905148	1
					397899	9905148	1
					398899	9905148	1
					399899	9905148	1
					400899	9905148	1
					401899	9905148	1
					402899	9905148	1
					403899	9905148	1
					404899	9905148	1
					369899	9906148	1
					370899	9906148	1
					371899	9906148	1
					372899	9906148	1
					373899	9906148	1
					374899	9906148	1
					375899	9906148	1
					376899	9906148	1
					377899	9906148	1
					378899	9906148	1
					379899	9906148	1
					380899	9906148	1
					381899	9906148	1
					382899	9906148	1
					383899	9906148	1
					384899	9906148	1
					385899	9906148	1
					386899	9906148	1
					387899	9906148	1
					388899	9906148	1
					389899	9906148	1
					390899	9906148	1
					391899	9906148	1
					392899	9906148	1
					393899	9906148	1
					394899	9906148	1
					395899	9906148	1
					396899	9906148	1
					397899	9906148	1
					398899	9906148	1
					399899	9906148	1
					400899	9906148	1
					401899	9906148	1
					402899	9906148	1
					403899	9906148	1
					404899	9906148	1
					405899	9906148	1
					369899	9907148	1
					370899	9907148	1
					371899	9907148	1
					372899	9907148	1
					373899	9907148	1
					374899	9907148	1
					375899	9907148	1
					376899	9907148	1
					377899	9907148	1
					378899	9907148	1
					379899	9907148	1
					380899	9907148	1
					381899	9907148	1
					382899	9907148	1
					383899	9907148	1
					384899	9907148	1
					385899	9907148	1
					386899	9907148	1
					387899	9907148	1
					388899	9907148	1
					389899	9907148	1
					390899	9907148	1
					391899	9907148	1
					392899	9907148	1
					393899	9907148	1
					394899	9907148	1
					395899	9907148	1
					396899	9907148	1
					397899	9907148	1
					398899	9907148	1
					399899	9907148	1
					400899	9907148	1
					401899	9907148	1
					402899	9907148	1
					403899	9907148	1
					404899	9907148	1
					405899	9907148	1
					406899	9907148	1
					368899	9908148	1
					369899	9908148	1
					370899	9908148	1
					371899	9908148	1
					372899	9908148	1
					373899	9908148	1
					374899	9908148	1
					375899	9908148	1
					376899	9908148	1
					377899	9908148	1
					378899	9908148	1
					379899	9908148	1
					380899	9908148	1
					381899	9908148	1
					382899	9908148	1
					383899	9908148	1
					384899	9908148	1
					385899	9908148	1
					386899	9908148	1
					387899	9908148	1
					388899	9908148	1
					389899	9908148	1
					390899	9908148	1
					391899	9908148	1
					392899	9908148	1
					393899	9908148	1
					394899	9908148	1
					395899	9908148	1
					396899	9908148	1
					397899	9908148	1
					398899	9908148	1
					399899	9908148	1
					400899	9908148	1
					401899	9908148	1
					402899	9908148	1
					403899	9908148	1
					404899	9908148	1
					405899	9908148	1
					406899	9908148	1
					407899	9908148	1
					367899	9909148	1
					368899	9909148	1
					369899	9909148	1
					370899	9909148	1
					371899	9909148	1
					372899	9909148	1
					373899	9909148	1
					374899	9909148	1
					375899	9909148	1
					376899	9909148	1
					377899	9909148	1
					378899	9909148	1
					379899	9909148	1
					380899	9909148	1
					381899	9909148	1
					382899	9909148	1
					383899	9909148	1
					384899	9909148	1
					385899	9909148	1
					386899	9909148	1
					387899	9909148	1
					388899	9909148	1
					389899	9909148	1
					390899	9909148	1
					391899	9909148	1
					392899	9909148	1
					393899	9909148	1
					394899	9909148	1
					395899	9909148	1
					396899	9909148	1
					397899	9909148	1
					398899	9909148	1
					399899	9909148	1
					400899	9909148	1
					401899	9909148	1
					402899	9909148	1
					403899	9909148	1
					404899	9909148	1
					405899	9909148	1
					406899	9909148	1
					407899	9909148	1
					367899	9910148	1
					368899	9910148	1
					369899	9910148	1
					370899	9910148	1
					371899	9910148	1
					372899	9910148	1
					373899	9910148	1
					374899	9910148	1
					375899	9910148	1
					376899	9910148	1
					377899	9910148	1
					378899	9910148	1
					379899	9910148	1
					380899	9910148	1
					381899	9910148	1
					382899	9910148	1
					383899	9910148	1
					384899	9910148	1
					385899	9910148	1
					386899	9910148	1
					387899	9910148	1
					388899	9910148	1
					389899	9910148	1
					390899	9910148	1
					391899	9910148	1
					392899	9910148	1
					393899	9910148	1
					394899	9910148	1
					395899	9910148	1
					396899	9910148	1
					397899	9910148	1
					398899	9910148	1
					399899	9910148	1
					400899	9910148	1
					401899	9910148	1
					402899	9910148	1
					403899	9910148	1
					404899	9910148	1
					405899	9910148	1
					406899	9910148	1
					407899	9910148	1
					367899	9911148	1
					368899	9911148	1
					369899	9911148	1
					370899	9911148	1
					371899	9911148	1
					372899	9911148	1
					373899	9911148	1
					374899	9911148	1
					375899	9911148	1
					376899	9911148	1
					377899	9911148	1
					378899	9911148	1
					379899	9911148	1
					380899	9911148	1
					381899	9911148	1
					382899	9911148	1
					383899	9911148	1
					384899	9911148	1
					385899	9911148	1
					386899	9911148	1
					387899	9911148	1
					388899	9911148	1
					389899	9911148	1
					390899	9911148	1
					391899	9911148	1
					392899	9911148	1
					393899	9911148	1
					394899	9911148	1
					395899	9911148	1
					396899	9911148	1
					397899	9911148	1
					398899	9911148	1
					399899	9911148	1
					400899	9911148	1
					401899	9911148	1
					402899	9911148	1
					403899	9911148	1
					404899	9911148	1
					405899	9911148	1
					406899	9911148	1
					407899	9911148	1
					408899	9911148	1
					366899	9912148	1
					367899	9912148	1
					368899	9912148	1
					369899	9912148	1
					370899	9912148	1
					371899	9912148	1
					372899	9912148	1
					373899	9912148	1
					374899	9912148	1
					375899	9912148	1
					376899	9912148	1
					377899	9912148	1
					378899	9912148	1
					379899	9912148	1
					380899	9912148	1
					381899	9912148	1
					382899	9912148	1
					383899	9912148	1
					384899	9912148	1
					385899	9912148	1
					386899	9912148	1
					387899	9912148	1
					388899	9912148	1
					389899	9912148	1
					390899	9912148	1
					391899	9912148	1
					392899	9912148	1
					393899	9912148	1
					394899	9912148	1
					395899	9912148	1
					396899	9912148	1
					397899	9912148	1
					398899	9912148	1
					399899	9912148	1
					400899	9912148	1
					401899	9912148	1
					402899	9912148	1
					403899	9912148	1
					404899	9912148	1
					405899	9912148	1
					406899	9912148	1
					407899	9912148	1
					408899	9912148	1
					366899	9913148	1
					367899	9913148	1
					368899	9913148	1
					369899	9913148	1
					370899	9913148	1
					371899	9913148	1
					372899	9913148	1
					373899	9913148	1
					374899	9913148	1
					375899	9913148	1
					376899	9913148	1
					377899	9913148	1
					378899	9913148	1
					379899	9913148	1
					380899	9913148	1
					381899	9913148	1
					382899	9913148	1
					383899	9913148	1
					384899	9913148	1
					385899	9913148	1
					386899	9913148	1
					387899	9913148	1
					388899	9913148	1
					389899	9913148	1
					390899	9913148	1
					391899	9913148	1
					392899	9913148	1
					393899	9913148	1
					394899	9913148	1
					395899	9913148	1
					396899	9913148	1
					397899	9913148	1
					398899	9913148	1
					399899	9913148	1
					400899	9913148	1
					401899	9913148	1
					402899	9913148	1
					403899	9913148	1
					404899	9913148	1
					405899	9913148	1
					406899	9913148	1
					407899	9913148	1
					408899	9913148	1
					366899	9914148	1
					367899	9914148	1
					368899	9914148	1
					369899	9914148	1
					370899	9914148	1
					371899	9914148	1
					372899	9914148	1
					373899	9914148	1
					374899	9914148	1
					375899	9914148	1
					376899	9914148	1
					377899	9914148	1
					378899	9914148	1
					379899	9914148	1
					380899	9914148	1
					381899	9914148	1
					382899	9914148	1
					383899	9914148	1
					384899	9914148	1
					385899	9914148	1
					386899	9914148	1
					387899	9914148	1
					388899	9914148	1
					389899	9914148	1
					390899	9914148	1
					391899	9914148	1
					392899	9914148	1
					393899	9914148	1
					394899	9914148	1
					395899	9914148	1
					396899	9914148	1
					397899	9914148	1
					398899	9914148	1
					399899	9914148	1
					400899	9914148	1
					401899	9914148	1
					402899	9914148	1
					403899	9914148	1
					404899	9914148	1
					405899	9914148	1
					406899	9914148	1
					407899	9914148	1
					408899	9914148	1
					366899	9915148	1
					367899	9915148	1
					368899	9915148	1
					369899	9915148	1
					370899	9915148	1
					371899	9915148	1
					372899	9915148	1
					373899	9915148	1
					374899	9915148	1
					375899	9915148	1
					376899	9915148	1
					377899	9915148	1
					378899	9915148	1
					379899	9915148	1
					380899	9915148	1
					381899	9915148	1
					382899	9915148	1
					383899	9915148	1
					384899	9915148	1
					385899	9915148	1
					386899	9915148	1
					387899	9915148	1
					388899	9915148	1
					389899	9915148	1
					390899	9915148	1
					391899	9915148	1
					392899	9915148	1
					393899	9915148	1
					394899	9915148	1
					395899	9915148	1
					396899	9915148	1
					397899	9915148	1
					398899	9915148	1
					399899	9915148	1
					400899	9915148	1
					401899	9915148	1
					402899	9915148	1
					403899	9915148	1
					404899	9915148	1
					405899	9915148	1
					406899	9915148	1
					407899	9915148	1
					408899	9915148	1
					409899	9915148	1
					366899	9916148	1
					367899	9916148	1
					368899	9916148	1
					369899	9916148	1
					370899	9916148	1
					371899	9916148	1
					372899	9916148	1
					373899	9916148	1
					374899	9916148	1
					375899	9916148	1
					376899	9916148	1
					377899	9916148	1
					378899	9916148	1
					379899	9916148	1
					380899	9916148	1
					381899	9916148	1
					382899	9916148	1
					383899	9916148	1
					384899	9916148	1
					385899	9916148	1
					386899	9916148	1
					387899	9916148	1
					388899	9916148	1
					389899	9916148	1
					390899	9916148	1
					391899	9916148	1
					392899	9916148	1
					393899	9916148	1
					394899	9916148	1
					395899	9916148	1
					396899	9916148	1
					397899	9916148	1
					398899	9916148	1
					399899	9916148	1
					400899	9916148	1
					401899	9916148	1
					402899	9916148	1
					403899	9916148	1
					404899	9916148	1
					405899	9916148	1
					406899	9916148	1
					407899	9916148	1
					408899	9916148	1
					409899	9916148	1
					366899	9917148	1
					367899	9917148	1
					368899	9917148	1
					369899	9917148	1
					370899	9917148	1
					371899	9917148	1
					372899	9917148	1
					373899	9917148	1
					374899	9917148	1
					375899	9917148	1
					376899	9917148	1
					377899	9917148	1
					378899	9917148	1
					379899	9917148	1
					380899	9917148	1
					381899	9917148	1
					382899	9917148	1
					383899	9917148	1
					384899	9917148	1
					385899	9917148	1
					386899	9917148	1
					387899	9917148	1
					388899	9917148	1
					389899	9917148	1
					390899	9917148	1
					391899	9917148	1
					392899	9917148	1
					393899	9917148	1
					394899	9917148	1
					395899	9917148	1
					396899	9917148	1
					397899	9917148	1
					398899	9917148	1
					399899	9917148	1
					400899	9917148	1
					401899	9917148	1
					402899	9917148	1
					403899	9917148	1
					404899	9917148	1
					405899	9917148	1
					406899	9917148	1
					407899	9917148	1
					408899	9917148	1
					409899	9917148	1
					366899	9918148	1
					367899	9918148	1
					368899	9918148	1
					369899	9918148	1
					370899	9918148	1
					371899	9918148	1
					372899	9918148	1
					373899	9918148	1
					374899	9918148	1
					375899	9918148	1
					376899	9918148	1
					377899	9918148	1
					378899	9918148	1
					379899	9918148	1
					380899	9918148	1
					381899	9918148	1
					382899	9918148	1
					383899	9918148	1
					384899	9918148	1
					385899	9918148	1
					386899	9918148	1
					387899	9918148	1
					388899	9918148	1
					389899	9918148	1
					390899	9918148	1
					391899	9918148	1
					392899	9918148	1
					393899	9918148	1
					394899	9918148	1
					395899	9918148	1
					396899	9918148	1
					397899	9918148	1
					398899	9918148	1
					399899	9918148	1
					400899	9918148	1
					401899	9918148	1
					402899	9918148	1
					403899	9918148	1
					404899	9918148	1
					405899	9918148	1
					406899	9918148	1
					407899	9918148	1
					408899	9918148	1
					409899	9918148	1
					366899	9919148	1
					367899	9919148	1
					368899	9919148	1
					369899	9919148	1
					370899	9919148	1
					371899	9919148	1
					372899	9919148	1
					373899	9919148	1
					374899	9919148	1
					375899	9919148	1
					376899	9919148	1
					377899	9919148	1
					378899	9919148	1
					379899	9919148	1
					380899	9919148	1
					381899	9919148	1
					382899	9919148	1
					383899	9919148	1
					384899	9919148	1
					385899	9919148	1
					386899	9919148	1
					387899	9919148	1
					388899	9919148	1
					389899	9919148	1
					390899	9919148	1
					391899	9919148	1
					392899	9919148	1
					393899	9919148	1
					394899	9919148	1
					395899	9919148	1
					396899	9919148	1
					397899	9919148	1
					398899	9919148	1
					399899	9919148	1
					400899	9919148	1
					401899	9919148	1
					402899	9919148	1
					403899	9919148	1
					404899	9919148	1
					405899	9919148	1
					406899	9919148	1
					407899	9919148	1
					408899	9919148	1
					409899	9919148	1
					366899	9920148	1
					367899	9920148	1
					368899	9920148	1
					369899	9920148	1
					370899	9920148	1
					371899	9920148	1
					372899	9920148	1
					373899	9920148	1
					374899	9920148	1
					375899	9920148	1
					376899	9920148	1
					377899	9920148	1
					378899	9920148	1
					379899	9920148	1
					380899	9920148	1
					381899	9920148	1
					382899	9920148	1
					383899	9920148	1
					384899	9920148	1
					385899	9920148	1
					386899	9920148	1
					387899	9920148	1
					388899	9920148	1
					389899	9920148	1
					390899	9920148	1
					391899	9920148	1
					392899	9920148	1
					393899	9920148	1
					394899	9920148	1
					395899	9920148	1
					396899	9920148	1
					397899	9920148	1
					398899	9920148	1
					399899	9920148	1
					400899	9920148	1
					401899	9920148	1
					402899	9920148	1
					403899	9920148	1
					404899	9920148	1
					405899	9920148	1
					406899	9920148	1
					407899	9920148	1
					408899	9920148	1
					409899	9920148	1
					366899	9921148	1
					367899	9921148	1
					368899	9921148	1
					369899	9921148	1
					370899	9921148	1
					371899	9921148	1
					372899	9921148	1
					373899	9921148	1
					374899	9921148	1
					375899	9921148	1
					376899	9921148	1
					377899	9921148	1
					378899	9921148	1
					379899	9921148	1
					380899	9921148	1
					381899	9921148	1
					382899	9921148	1
					383899	9921148	1
					384899	9921148	1
					385899	9921148	1
					386899	9921148	1
					387899	9921148	1
					388899	9921148	1
					389899	9921148	1
					390899	9921148	1
					391899	9921148	1
					392899	9921148	1
					393899	9921148	1
					394899	9921148	1
					395899	9921148	1
					396899	9921148	1
					397899	9921148	1
					398899	9921148	1
					399899	9921148	1
					400899	9921148	1
					401899	9921148	1
					402899	9921148	1
					403899	9921148	1
					404899	9921148	1
					405899	9921148	1
					406899	9921148	1
					407899	9921148	1
					408899	9921148	1
					409899	9921148	1
					366899	9922148	1
					367899	9922148	1
					368899	9922148	1
					369899	9922148	1
					370899	9922148	1
					371899	9922148	1
					372899	9922148	1
					373899	9922148	1
					374899	9922148	1
					375899	9922148	1
					376899	9922148	1
					377899	9922148	1
					378899	9922148	1
					379899	9922148	1
					380899	9922148	1
					381899	9922148	1
					382899	9922148	1
					383899	9922148	1
					384899	9922148	1
					385899	9922148	1
					386899	9922148	1
					387899	9922148	1
					388899	9922148	1
					389899	9922148	1
					390899	9922148	1
					391899	9922148	1
					392899	9922148	1
					393899	9922148	1
					394899	9922148	1
					395899	9922148	1
					396899	9922148	1
					397899	9922148	1
					398899	9922148	1
					399899	9922148	1
					400899	9922148	1
					401899	9922148	1
					402899	9922148	1
					403899	9922148	1
					404899	9922148	1
					405899	9922148	1
					406899	9922148	1
					407899	9922148	1
					408899	9922148	1
					409899	9922148	1
					366899	9923148	1
					367899	9923148	1
					368899	9923148	1
					369899	9923148	1
					370899	9923148	1
					371899	9923148	1
					372899	9923148	1
					373899	9923148	1
					374899	9923148	1
					375899	9923148	1
					376899	9923148	1
					377899	9923148	1
					378899	9923148	1
					379899	9923148	1
					380899	9923148	1
					381899	9923148	1
					382899	9923148	1
					383899	9923148	1
					384899	9923148	1
					385899	9923148	1
					386899	9923148	1
					387899	9923148	1
					388899	9923148	1
					389899	9923148	1
					390899	9923148	1
					391899	9923148	1
					392899	9923148	1
					393899	9923148	1
					394899	9923148	1
					395899	9923148	1
					396899	9923148	1
					397899	9923148	1
					398899	9923148	1
					399899	9923148	1
					400899	9923148	1
					401899	9923148	1
					402899	9923148	1
					403899	9923148	1
					404899	9923148	1
					405899	9923148	1
					406899	9923148	1
					407899	9923148	1
					408899	9923148	1
					409899	9923148	1
					366899	9924148	1
					367899	9924148	1
					368899	9924148	1
					369899	9924148	1
					370899	9924148	1
					371899	9924148	1
					372899	9924148	1
					373899	9924148	1
					374899	9924148	1
					375899	9924148	1
					376899	9924148	1
					377899	9924148	1
					378899	9924148	1
					379899	9924148	1
					380899	9924148	1
					381899	9924148	1
					382899	9924148	1
					383899	9924148	1
					384899	9924148	1
					385899	9924148	1
					386899	9924148	1
					387899	9924148	1
					388899	9924148	1
					389899	9924148	1
					390899	9924148	1
					391899	9924148	1
					392899	9924148	1
					393899	9924148	1
					394899	9924148	1
					395899	9924148	1
					396899	9924148	1
					397899	9924148	1
					398899	9924148	1
					399899	9924148	1
					400899	9924148	1
					401899	9924148	1
					402899	9924148	1
					403899	9924148	1
					404899	9924148	1
					405899	9924148	1
					406899	9924148	1
					407899	9924148	1
					408899	9924148	1
					409899	9924148	1
					366899	9925148	1
					367899	9925148	1
					368899	9925148	1
					369899	9925148	1
					370899	9925148	1
					371899	9925148	1
					372899	9925148	1
					373899	9925148	1
					374899	9925148	1
					375899	9925148	1
					376899	9925148	1
					377899	9925148	1
					378899	9925148	1
					379899	9925148	1
					380899	9925148	1
					381899	9925148	1
					382899	9925148	1
					383899	9925148	1
					384899	9925148	1
					385899	9925148	1
					386899	9925148	1
					387899	9925148	1
					388899	9925148	1
					389899	9925148	1
					390899	9925148	1
					391899	9925148	1
					392899	9925148	1
					393899	9925148	1
					394899	9925148	1
					395899	9925148	1
					396899	9925148	1
					397899	9925148	1
					398899	9925148	1
					399899	9925148	1
					400899	9925148	1
					401899	9925148	1
					402899	9925148	1
					403899	9925148	1
					404899	9925148	1
					405899	9925148	1
					406899	9925148	1
					407899	9925148	1
					408899	9925148	1
					409899	9925148	1
					366899	9926148	1
					367899	9926148	1
					368899	9926148	1
					369899	9926148	1
					370899	9926148	1
					371899	9926148	1
					372899	9926148	1
					373899	9926148	1
					374899	9926148	1
					375899	9926148	1
					376899	9926148	1
					377899	9926148	1
					378899	9926148	1
					379899	9926148	1
					380899	9926148	1
					381899	9926148	1
					382899	9926148	1
					383899	9926148	1
					384899	9926148	1
					385899	9926148	1
					386899	9926148	1
					387899	9926148	1
					388899	9926148	1
					389899	9926148	1
					390899	9926148	1
					391899	9926148	1
					392899	9926148	1
					393899	9926148	1
					394899	9926148	1
					395899	9926148	1
					396899	9926148	1
					397899	9926148	1
					398899	9926148	1
					399899	9926148	1
					400899	9926148	1
					401899	9926148	1
					402899	9926148	1
					403899	9926148	1
					404899	9926148	1
					405899	9926148	1
					406899	9926148	1
					407899	9926148	1
					408899	9926148	1
					409899	9926148	1
					366899	9927148	1
					367899	9927148	1
					368899	9927148	1
					369899	9927148	1
					370899	9927148	1
					371899	9927148	1
					372899	9927148	1
					373899	9927148	1
					374899	9927148	1
					375899	9927148	1
					376899	9927148	1
					377899	9927148	1
					378899	9927148	1
					379899	9927148	1
					380899	9927148	1
					381899	9927148	1
					382899	9927148	1
					383899	9927148	1
					384899	9927148	1
					385899	9927148	1
					386899	9927148	1
					387899	9927148	1
					388899	9927148	1
					389899	9927148	1
					390899	9927148	1
					391899	9927148	1
					392899	9927148	1
					393899	9927148	1
					394899	9927148	1
					395899	9927148	1
					396899	9927148	1
					397899	9927148	1
					398899	9927148	1
					399899	9927148	1
					400899	9927148	1
					401899	9927148	1
					402899	9927148	1
					403899	9927148	1
					404899	9927148	1
					405899	9927148	1
					406899	9927148	1
					407899	9927148	1
					408899	9927148	1
					409899	9927148	1
					366899	9928148	1
					367899	9928148	1
					368899	9928148	1
					369899	9928148	1
					370899	9928148	1
					371899	9928148	1
					372899	9928148	1
					373899	9928148	1
					374899	9928148	1
					375899	9928148	1
					376899	9928148	1
					377899	9928148	1
					378899	9928148	1
					379899	9928148	1
					380899	9928148	1
					381899	9928148	1
					382899	9928148	1
					383899	9928148	1
					384899	9928148	1
					385899	9928148	1
					386899	9928148	1
					387899	9928148	1
					388899	9928148	1
					389899	9928148	1
					390899	9928148	1
					391899	9928148	1
					392899	9928148	1
					393899	9928148	1
					394899	9928148	1
					395899	9928148	1
					396899	9928148	1
					397899	9928148	1
					398899	9928148	1
					399899	9928148	1
					400899	9928148	1
					401899	9928148	1
					402899	9928148	1
					403899	9928148	1
					404899	9928148	1
					405899	9928148	1
					406899	9928148	1
					407899	9928148	1
					408899	9928148	1
					409899	9928148	1
					366899	9929148	1
					367899	9929148	1
					368899	9929148	1
					369899	9929148	1
					370899	9929148	1
					371899	9929148	1
					372899	9929148	1
					373899	9929148	1
					374899	9929148	1
					375899	9929148	1
					376899	9929148	1
					377899	9929148	1
					378899	9929148	1
					379899	9929148	1
					380899	9929148	1
					381899	9929148	1
					382899	9929148	1
					383899	9929148	1
					384899	9929148	1
					385899	9929148	1
					386899	9929148	1
					387899	9929148	1
					388899	9929148	1
					389899	9929148	1
					390899	9929148	1
					391899	9929148	1
					392899	9929148	1
					393899	9929148	1
					394899	9929148	1
					395899	9929148	1
					396899	9929148	1
					397899	9929148	1
					398899	9929148	1
					399899	9929148	1
					400899	9929148	1
					401899	9929148	1
					402899	9929148	1
					403899	9929148	1
					404899	9929148	1
					405899	9929148	1
					406899	9929148	1
					407899	9929148	1
					408899	9929148	1
					366899	9930148	1
					367899	9930148	1
					368899	9930148	1
					369899	9930148	1
					370899	9930148	1
					371899	9930148	1
					372899	9930148	1
					373899	9930148	1
					374899	9930148	1
					375899	9930148	1
					376899	9930148	1
					377899	9930148	1
					378899	9930148	1
					379899	9930148	1
					380899	9930148	1
					381899	9930148	1
					382899	9930148	1
					383899	9930148	1
					384899	9930148	1
					385899	9930148	1
					386899	9930148	1
					387899	9930148	1
					388899	9930148	1
					389899	9930148	1
					390899	9930148	1
					391899	9930148	1
					392899	9930148	1
					393899	9930148	1
					394899	9930148	1
					395899	9930148	1
					396899	9930148	1
					397899	9930148	1
					398899	9930148	1
					399899	9930148	1
					400899	9930148	1
					401899	9930148	1
					402899	9930148	1
					403899	9930148	1
					404899	9930148	1
					405899	9930148	1
					406899	9930148	1
					407899	9930148	1
					408899	9930148	0
					366899	9931148	1
					367899	9931148	1
					368899	9931148	1
					369899	9931148	1
					370899	9931148	1
					371899	9931148	1
					372899	9931148	1
					373899	9931148	1
					374899	9931148	1
					375899	9931148	1
					376899	9931148	1
					377899	9931148	1
					378899	9931148	1
					379899	9931148	1
					380899	9931148	1
					381899	9931148	1
					382899	9931148	1
					383899	9931148	1
					384899	9931148	1
					385899	9931148	1
					386899	9931148	1
					387899	9931148	1
					388899	9931148	1
					389899	9931148	1
					390899	9931148	1
					391899	9931148	1
					392899	9931148	1
					393899	9931148	1
					394899	9931148	1
					395899	9931148	1
					396899	9931148	1
					397899	9931148	1
					398899	9931148	1
					399899	9931148	1
					400899	9931148	1
					401899	9931148	1
					402899	9931148	1
					403899	9931148	1
					404899	9931148	0
					405899	9931148	0
					406899	9931148	0
					407899	9931148	0
					408899	9931148	0
					366899	9932148	1
					367899	9932148	1
					368899	9932148	1
					369899	9932148	1
					370899	9932148	1
					371899	9932148	1
					372899	9932148	1
					373899	9932148	1
					374899	9932148	1
					375899	9932148	1
					376899	9932148	1
					377899	9932148	1
					378899	9932148	1
					379899	9932148	1
					380899	9932148	1
					381899	9932148	1
					382899	9932148	1
					383899	9932148	1
					384899	9932148	1
					385899	9932148	1
					386899	9932148	1
					387899	9932148	1
					388899	9932148	1
					389899	9932148	1
					390899	9932148	1
					391899	9932148	1
					392899	9932148	1
					393899	9932148	1
					394899	9932148	1
					395899	9932148	1
					396899	9932148	1
					397899	9932148	1
					398899	9932148	1
					399899	9932148	1
					400899	9932148	1
					401899	9932148	1
					402899	9932148	0
					403899	9932148	0
					404899	9932148	0
					405899	9932148	0
					406899	9932148	0
					407899	9932148	0
					408899	9932148	0
					367899	9933148	1
					368899	9933148	1
					369899	9933148	1
					370899	9933148	1
					371899	9933148	1
					372899	9933148	1
					373899	9933148	1
					374899	9933148	1
					375899	9933148	1
					376899	9933148	1
					377899	9933148	1
					378899	9933148	1
					379899	9933148	1
					380899	9933148	1
					381899	9933148	1
					382899	9933148	1
					383899	9933148	1
					384899	9933148	1
					385899	9933148	1
					386899	9933148	1
					387899	9933148	1
					388899	9933148	1
					389899	9933148	1
					390899	9933148	1
					391899	9933148	1
					392899	9933148	1
					393899	9933148	1
					394899	9933148	1
					395899	9933148	1
					396899	9933148	1
					397899	9933148	1
					398899	9933148	1
					399899	9933148	1
					400899	9933148	1
					401899	9933148	0
					402899	9933148	0
					403899	9933148	0
					404899	9933148	0
					405899	9933148	0
					406899	9933148	0
					407899	9933148	0
					408899	9933148	0
					367899	9934148	1
					368899	9934148	1
					369899	9934148	1
					370899	9934148	1
					371899	9934148	1
					372899	9934148	1
					373899	9934148	1
					374899	9934148	1
					375899	9934148	1
					376899	9934148	1
					377899	9934148	1
					378899	9934148	1
					379899	9934148	1
					380899	9934148	1
					381899	9934148	1
					382899	9934148	1
					383899	9934148	1
					384899	9934148	1
					385899	9934148	1
					386899	9934148	1
					387899	9934148	1
					388899	9934148	1
					389899	9934148	1
					390899	9934148	1
					391899	9934148	1
					392899	9934148	1
					393899	9934148	1
					394899	9934148	1
					395899	9934148	1
					396899	9934148	1
					397899	9934148	1
					398899	9934148	1
					399899	9934148	0
					400899	9934148	0
					401899	9934148	0
					402899	9934148	0
					403899	9934148	0
					404899	9934148	0
					405899	9934148	0
					406899	9934148	0
					407899	9934148	0
					368899	9935148	1
					369899	9935148	1
					370899	9935148	1
					371899	9935148	1
					372899	9935148	1
					373899	9935148	1
					374899	9935148	1
					375899	9935148	1
					376899	9935148	1
					377899	9935148	1
					378899	9935148	1
					379899	9935148	1
					380899	9935148	1
					381899	9935148	1
					382899	9935148	1
					383899	9935148	1
					384899	9935148	1
					385899	9935148	1
					386899	9935148	1
					387899	9935148	1
					388899	9935148	1
					389899	9935148	1
					390899	9935148	1
					391899	9935148	1
					392899	9935148	1
					393899	9935148	1
					394899	9935148	1
					395899	9935148	1
					396899	9935148	1
					397899	9935148	1
					398899	9935148	0
					399899	9935148	0
					400899	9935148	0
					401899	9935148	0
					402899	9935148	0
					403899	9935148	0
					404899	9935148	0
					405899	9935148	0
					406899	9935148	0
					407899	9935148	0
					368899	9936148	1
					369899	9936148	1
					370899	9936148	1
					371899	9936148	1
					372899	9936148	1
					373899	9936148	1
					374899	9936148	1
					375899	9936148	1
					376899	9936148	1
					377899	9936148	1
					378899	9936148	1
					379899	9936148	1
					380899	9936148	1
					381899	9936148	1
					382899	9936148	1
					383899	9936148	1
					384899	9936148	1
					385899	9936148	1
					386899	9936148	1
					387899	9936148	1
					388899	9936148	1
					389899	9936148	1
					390899	9936148	1
					391899	9936148	1
					392899	9936148	1
					393899	9936148	1
					394899	9936148	1
					395899	9936148	0
					396899	9936148	0
					397899	9936148	0
					398899	9936148	0
					399899	9936148	0
					400899	9936148	0
					401899	9936148	0
					402899	9936148	0
					403899	9936148	0
					404899	9936148	0
					405899	9936148	0
					406899	9936148	0
					369899	9937148	1
					370899	9937148	1
					371899	9937148	1
					372899	9937148	1
					373899	9937148	1
					374899	9937148	1
					375899	9937148	1
					376899	9937148	1
					377899	9937148	1
					378899	9937148	1
					379899	9937148	1
					380899	9937148	1
					381899	9937148	1
					382899	9937148	1
					383899	9937148	1
					384899	9937148	1
					385899	9937148	1
					386899	9937148	1
					387899	9937148	1
					388899	9937148	1
					389899	9937148	1
					390899	9937148	0
					391899	9937148	0
					392899	9937148	0
					393899	9937148	0
					394899	9937148	0
					395899	9937148	0
					396899	9937148	0
					397899	9937148	0
					398899	9937148	0
					399899	9937148	0
					400899	9937148	0
					401899	9937148	0
					402899	9937148	0
					403899	9937148	0
					404899	9937148	0
					405899	9937148	0
					406899	9937148	0
					370899	9938148	1
					371899	9938148	1
					372899	9938148	1
					373899	9938148	1
					374899	9938148	1
					375899	9938148	1
					376899	9938148	1
					377899	9938148	1
					378899	9938148	1
					379899	9938148	1
					380899	9938148	1
					381899	9938148	1
					382899	9938148	1
					383899	9938148	1
					384899	9938148	1
					385899	9938148	1
					386899	9938148	1
					387899	9938148	1
					388899	9938148	0
					389899	9938148	0
					390899	9938148	0
					391899	9938148	0
					392899	9938148	0
					393899	9938148	0
					394899	9938148	0
					395899	9938148	0
					396899	9938148	0
					397899	9938148	0
					398899	9938148	0
					399899	9938148	0
					400899	9938148	0
					401899	9938148	0
					402899	9938148	0
					403899	9938148	0
					404899	9938148	0
					405899	9938148	0
					371899	9939148	1
					372899	9939148	1
					373899	9939148	1
					374899	9939148	1
					375899	9939148	1
					376899	9939148	1
					377899	9939148	1
					378899	9939148	1
					379899	9939148	1
					380899	9939148	1
					381899	9939148	1
					382899	9939148	1
					383899	9939148	1
					384899	9939148	1
					385899	9939148	1
					386899	9939148	1
					387899	9939148	0
					388899	9939148	0
					389899	9939148	0
					390899	9939148	0
					391899	9939148	0
					392899	9939148	0
					393899	9939148	0
					394899	9939148	0
					395899	9939148	0
					396899	9939148	0
					397899	9939148	0
					398899	9939148	0
					399899	9939148	0
					400899	9939148	0
					401899	9939148	0
					402899	9939148	0
					403899	9939148	0
					404899	9939148	0
					372899	9940148	1
					373899	9940148	1
					374899	9940148	1
					375899	9940148	1
					376899	9940148	1
					377899	9940148	1
					378899	9940148	1
					379899	9940148	1
					380899	9940148	1
					381899	9940148	1
					382899	9940148	1
					383899	9940148	1
					384899	9940148	1
					385899	9940148	1
					386899	9940148	0
					387899	9940148	0
					388899	9940148	0
					389899	9940148	0
					390899	9940148	0
					391899	9940148	0
					392899	9940148	0
					393899	9940148	0
					394899	9940148	0
					395899	9940148	0
					396899	9940148	0
					397899	9940148	0
					398899	9940148	0
					399899	9940148	0
					400899	9940148	0
					401899	9940148	0
					402899	9940148	0
					403899	9940148	0
					373899	9941148	1
					374899	9941148	1
					375899	9941148	1
					376899	9941148	1
					377899	9941148	1
					378899	9941148	1
					379899	9941148	1
					380899	9941148	1
					381899	9941148	1
					382899	9941148	1
					383899	9941148	1
					384899	9941148	1
					385899	9941148	0
					386899	9941148	0
					387899	9941148	0
					388899	9941148	0
					389899	9941148	0
					390899	9941148	0
					391899	9941148	0
					392899	9941148	0
					393899	9941148	0
					394899	9941148	0
					395899	9941148	0
					396899	9941148	0
					397899	9941148	0
					398899	9941148	0
					399899	9941148	0
					400899	9941148	0
					401899	9941148	0
					375899	9942148	1
					376899	9942148	1
					377899	9942148	1
					378899	9942148	1
					379899	9942148	1
					380899	9942148	1
					381899	9942148	1
					382899	9942148	1
					383899	9942148	0
					384899	9942148	0
					385899	9942148	0
					386899	9942148	0
					387899	9942148	0
					388899	9942148	0
					389899	9942148	0
					390899	9942148	0
					391899	9942148	0
					392899	9942148	0
					393899	9942148	0
					394899	9942148	0
					395899	9942148	0
					396899	9942148	0
					397899	9942148	0
					398899	9942148	0
					399899	9942148	0
					379899	9943148	1
					380899	9943148	1
					381899	9943148	1
					382899	9943148	1
					383899	9943148	0
					384899	9943148	0
					385899	9943148	0
					386899	9943148	0
					387899	9943148	0
					388899	9943148	0
					389899	9943148	0
					390899	9943148	0
					391899	9943148	0
					392899	9943148	0
					393899	9943148	0
					394899	9943148	0
					395899	9943148	0
					396899	9943148	0
[truncated: 53 more columns]

## Sheet: SECR-Kewerino
Data for SECR analysis*: Keweriono site
*Data is in the format required to be used with R Package SPACECAP
Capture history matrix					Potential home rance centers matrix					Trap deployment matrix
LOC_ID	ANIMAL_ID	SO			X_COORD	Y_COORD	HABITAT			LOC_ID	X_COORD	Y_COORD	1	2	3	4	5	6	7	8	9	10	11	12	13	14	15	16	17	18	19	20	21	22	23	24	25	26	27	28	29	30	31	32	33	34	35	36	37
23	1	7			254329	9867842	1			1	268559	9890400	1	1	1	1	1	1	1	1	1	1	1	1	1	1	1	1	1	1	1	1	1	1	1	1	1	1	1	1	1	1	1	1	1	1	1	1	1
19	1	51			255329	9867842	1			2	268294	9892649	1	1	1	1	1	1	1	1	1	1	1	1	1	1	1	1	1	1	1	1	1	0	0	1	1	1	1	1	1	1	1	1	1	1	1	1	1
23	1	64			256329	9867842	1			3	268829	9887826	1	1	1	1	1	1	1	1	1	1	1	1	1	1	1	1	1	1	1	1	1	1	1	1	1	1	1	1	1	1	1	1	1	1	1	1	1
10	2	75			257329	9867842	1			4	268808	9885652	1	1	1	1	1	1	1	1	1	1	1	1	1	1	1	1	1	1	1	1	1	1	1	1	1	1	1	1	1	1	1	1	1	1	1	1	1
16	2	83			258329	9867842	1			5	268595	9884467	1	1	1	1	1	1	1	1	1	1	1	1	1	1	1	1	1	1	1	1	1	1	0	1	1	1	1	1	1	1	1	1	1	1	0	1	1
10	2	90			259329	9867842	1			6	265576	9890049	1	1	1	1	1	1	1	1	1	1	1	1	1	1	1	1	1	1	1	1	1	1	1	1	1	1	1	1	1	1	1	1	1	1	1	1	1
21	3	32			260329	9867842	1			7	264272	9891997	1	1	1	1	1	1	0	0	0	0	0	0	0	0	0	0	0	0	0	0	0	0	0	0	0	0	0	0	0	0	0	0	0	1	1	1	1
21	3	56			261329	9867842	1			8	264590	9887873	1	1	1	1	1	1	1	1	1	1	1	1	1	1	1	1	1	1	1	1	1	1	1	1	1	1	1	1	1	1	1	1	1	1	1	1	1
20	4	3			262329	9867842	1			9	265183	9885772	1	1	1	1	1	1	1	1	1	1	1	1	1	1	1	1	1	1	1	1	1	1	1	1	1	1	1	1	1	1	1	1	1	1	1	1	1
20	4	33			263329	9867842	1			10	265422	9883522	1	1	1	1	1	1	1	1	1	1	1	1	1	1	1	1	1	1	1	1	1	1	1	1	1	1	1	1	1	1	1	1	1	1	1	1	1
4	4	55			264329	9867842	1			11	260921	9886572	1	1	1	1	1	1	1	1	1	1	1	1	1	1	1	1	1	1	1	1	1	1	1	1	1	1	1	1	1	1	1	1	1	1	1	1	1
1	5	50			265329	9867842	1			12	262459	9889632	1	1	1	1	1	1	1	1	1	1	1	1	1	1	1	1	1	1	1	1	1	1	1	1	1	1	1	1	1	1	1	1	1	1	1	1	1
4	6	38			266329	9867842	1			13	261721	9891722	1	1	1	1	1	1	1	1	1	1	1	1	1	1	1	1	1	1	1	1	1	1	1	1	1	1	1	1	1	1	1	1	1	1	1	1	1
13	7	27			267329	9867842	1			14	262080	9887364	1	1	1	1	1	1	1	1	1	1	1	1	1	1	1	1	1	1	1	1	1	1	1	1	1	1	1	1	1	1	1	1	1	1	1	1	1
23	8	76			268329	9867842	1			15	262252	9885262	1	1	1	1	1	1	1	1	1	1	1	1	1	1	1	1	1	1	1	1	1	1	1	1	1	1	1	1	1	1	1	1	1	1	1	1	1
					269329	9867842	1			16	262776	9882470	1	1	1	1	1	1	1	1	1	1	1	1	1	1	1	1	1	1	1	1	1	1	1	1	1	1	1	1	1	1	1	1	1	1	1	1	1
					270329	9867842	1			17	266982	9887746	1	1	1	1	1	1	1	1	1	1	1	1	1	1	1	1	1	1	1	1	1	1	1	1	1	1	1	1	1	1	1	1	1	1	1	1	1
					271329	9867842	1			18	259303	9888092	1	1	1	1	1	1	1	1	1	1	1	1	1	1	1	1	1	1	1	1	1	1	1	1	1	1	1	1	1	1	1	1	1	1	1	1	1
					272329	9867842	1			19	259141	9890335	1	1	1	1	1	1	1	1	1	1	1	1	1	1	1	1	1	1	1	1	1	1	1	1	1	1	1	1	1	1	1	1	1	1	1	1	1
					273329	9867842	1			20	259282	9892470	1	1	1	1	1	1	1	1	1	1	1	1	1	1	1	1	1	1	1	1	1	1	1	1	1	1	1	1	1	1	1	1	1	1	1	1	1
					274329	9867842	1			21	271267	9888792	1	1	1	1	1	1	1	1	1	1	1	1	1	1	1	1	1	1	1	1	1	1	1	1	1	1	1	1	1	1	1	1	1	1	1	1	1
					251329	9868842	1			22	258540	9885211	1	1	1	1	1	1	1	1	1	1	1	1	1	1	1	1	1	1	1	1	1	1	1	1	1	1	1	1	1	1	1	1	1	1	1	1	1
					252329	9868842	1			23	257829	9882342	1	1	1	1	1	1	1	1	1	1	1	1	1	1	1	1	1	1	1	1	1	1	1	1	1	1	1	1	1	1	1	1	1	1	1	1	1
					253329	9868842	1
					254329	9868842	1
					255329	9868842	1
					256329	9868842	1
					257329	9868842	1
					258329	9868842	1
					259329	9868842	1
					260329	9868842	1
					261329	9868842	1
					262329	9868842	1
					263329	9868842	1
					264329	9868842	1
					265329	9868842	1
					266329	9868842	1
					267329	9868842	1
					268329	9868842	1
					269329	9868842	1
					270329	9868842	1
					271329	9868842	1
					272329	9868842	1
					273329	9868842	1
					274329	9868842	1
					275329	9868842	1
					276329	9868842	1
					277329	9868842	1
					250329	9869842	1
					251329	9869842	1
					252329	9869842	1
					253329	9869842	1
					254329	9869842	1
					255329	9869842	1
					256329	9869842	1
					257329	9869842	1
					258329	9869842	1
					259329	9869842	1
					260329	9869842	1
					261329	9869842	1
					262329	9869842	1
					263329	9869842	1
					264329	9869842	1
					265329	9869842	1
					266329	9869842	1
					267329	9869842	1
					268329	9869842	1
					269329	9869842	1
					270329	9869842	1
					271329	9869842	1
					272329	9869842	1
					273329	9869842	1
					274329	9869842	1
					275329	9869842	1
					276329	9869842	1
					277329	9869842	1
					278329	9869842	1
					279329	9869842	1
					248329	9870842	1
					249329	9870842	1
					250329	9870842	1
					251329	9870842	1
					252329	9870842	1
					253329	9870842	1
					254329	9870842	1
					255329	9870842	1
					256329	9870842	1
					257329	9870842	1
					258329	9870842	1
					259329	9870842	1
					260329	9870842	1
					261329	9870842	1
					262329	9870842	1
					263329	9870842	1
					264329	9870842	1
					265329	9870842	1
					266329	9870842	1
					267329	9870842	1
					268329	9870842	1
					269329	9870842	1
					270329	9870842	1
					271329	9870842	1
					272329	9870842	1
					273329	9870842	1
					274329	9870842	1
					275329	9870842	1
					276329	9870842	1
					277329	9870842	1
					278329	9870842	1
					279329	9870842	1
					280329	9870842	1
					247329	9871842	1
					248329	9871842	1
					249329	9871842	1
					250329	9871842	1
					251329	9871842	1
					252329	9871842	1
					253329	9871842	1
					254329	9871842	1
					255329	9871842	1
					256329	9871842	1
					257329	9871842	1
					258329	9871842	1
					259329	9871842	1
					260329	9871842	1
					261329	9871842	1
					262329	9871842	1
					263329	9871842	1
					264329	9871842	1
					265329	9871842	1
					266329	9871842	1
					267329	9871842	1
					268329	9871842	1
					269329	9871842	1
					270329	9871842	1
					271329	9871842	1
					272329	9871842	1
					273329	9871842	1
					274329	9871842	1
					275329	9871842	1
					276329	9871842	1
					277329	9871842	1
					278329	9871842	1
					279329	9871842	1
					280329	9871842	1
					281329	9871842	1
					246329	9872842	0
					247329	9872842	0
					248329	9872842	0
					249329	9872842	1
					250329	9872842	1
					251329	9872842	1
					252329	9872842	1
					253329	9872842	1
					254329	9872842	1
					255329	9872842	1
					256329	9872842	1
					257329	9872842	1
					258329	9872842	1
					259329	9872842	1
					260329	9872842	1
					261329	9872842	1
					262329	9872842	1
					263329	9872842	1
					264329	9872842	1
					265329	9872842	1
					266329	9872842	1
					267329	9872842	1
					268329	9872842	1
					269329	9872842	1
					270329	9872842	1
					271329	9872842	1
					272329	9872842	1
					273329	9872842	1
					274329	9872842	1
					275329	9872842	1
					276329	9872842	1
					277329	9872842	1
					278329	9872842	1
					279329	9872842	1
					280329	9872842	1
					281329	9872842	1
					282329	9872842	1
					246329	9873842	1
					247329	9873842	1
					248329	9873842	1
					249329	9873842	1
					250329	9873842	1
					251329	9873842	1
					252329	9873842	1
					253329	9873842	1
					254329	9873842	1
					255329	9873842	1
					256329	9873842	1
					257329	9873842	1
					258329	9873842	1
					259329	9873842	1
					260329	9873842	1
					261329	9873842	1
					262329	9873842	1
					263329	9873842	1
					264329	9873842	1
					265329	9873842	1
					266329	9873842	1
					267329	9873842	1
					268329	9873842	1
					269329	9873842	1
					270329	9873842	1
					271329	9873842	1
					272329	9873842	1
					273329	9873842	1
					274329	9873842	1
					275329	9873842	1
					276329	9873842	1
					277329	9873842	1
					278329	9873842	1
					279329	9873842	1
					280329	9873842	1
					281329	9873842	1
					282329	9873842	1
					283329	9873842	1
					245329	9874842	1
					246329	9874842	1
					247329	9874842	1
					248329	9874842	1
					249329	9874842	1
					250329	9874842	1
					251329	9874842	1
					252329	9874842	1
					253329	9874842	1
					254329	9874842	1
					255329	9874842	1
					256329	9874842	1
					257329	9874842	1
					258329	9874842	1
					259329	9874842	1
					260329	9874842	1
					261329	9874842	1
					262329	9874842	1
					263329	9874842	1
					264329	9874842	1
					265329	9874842	1
					266329	9874842	1
					267329	9874842	1
					268329	9874842	1
					269329	9874842	1
					270329	9874842	1
					271329	9874842	1
					272329	9874842	1
					273329	9874842	1
					274329	9874842	1
					275329	9874842	1
					276329	9874842	1
					277329	9874842	1
					278329	9874842	1
					279329	9874842	1
					280329	9874842	1
					281329	9874842	1
					282329	9874842	1
					283329	9874842	1
					244329	9875842	1
					245329	9875842	1
					246329	9875842	1
					247329	9875842	1
					248329	9875842	1
					249329	9875842	1
					250329	9875842	1
					251329	9875842	1
					252329	9875842	1
					253329	9875842	1
					254329	9875842	1
					255329	9875842	1
					256329	9875842	1
					257329	9875842	1
					258329	9875842	1
					259329	9875842	1
					260329	9875842	1
					261329	9875842	1
					262329	9875842	1
					263329	9875842	1
					264329	9875842	1
					265329	9875842	1
					266329	9875842	1
					267329	9875842	1
					268329	9875842	1
					269329	9875842	1
					270329	9875842	1
					271329	9875842	1
					272329	9875842	1
					273329	9875842	1
					274329	9875842	1
					275329	9875842	1
					276329	9875842	1
					277329	9875842	1
					278329	9875842	1
					279329	9875842	1
					280329	9875842	1
					281329	9875842	1
					282329	9875842	1
					283329	9875842	1
					284329	9875842	0
					244329	9876842	1
					245329	9876842	1
					246329	9876842	1
					247329	9876842	1
					248329	9876842	1
					249329	9876842	1
					250329	9876842	1
					251329	9876842	1
					252329	9876842	1
					253329	9876842	1
					254329	9876842	1
					255329	9876842	1
					256329	9876842	1
					257329	9876842	1
					258329	9876842	1
					259329	9876842	1
					260329	9876842	1
					261329	9876842	1
					262329	9876842	1
					263329	9876842	1
					264329	9876842	1
					265329	9876842	1
					266329	9876842	1
					267329	9876842	1
					268329	9876842	1
					269329	9876842	1
					270329	9876842	1
					271329	9876842	1
					272329	9876842	1
					273329	9876842	1
					274329	9876842	1
					275329	9876842	1
					276329	9876842	1
					277329	9876842	1
					278329	9876842	1
					279329	9876842	1
					280329	9876842	1
					281329	9876842	1
					282329	9876842	1
					283329	9876842	1
					284329	9876842	0
					244329	9877842	1
					245329	9877842	1
					246329	9877842	1
					247329	9877842	1
					248329	9877842	1
					249329	9877842	1
					250329	9877842	1
					251329	9877842	1
					252329	9877842	1
					253329	9877842	1
					254329	9877842	1
					255329	9877842	1
					256329	9877842	1
					257329	9877842	1
					258329	9877842	1
					259329	9877842	1
					260329	9877842	1
					261329	9877842	1
					262329	9877842	1
					263329	9877842	1
					264329	9877842	1
					265329	9877842	1
					266329	9877842	1
					267329	9877842	1
					268329	9877842	1
					269329	9877842	1
					270329	9877842	1
					271329	9877842	1
					272329	9877842	1
					273329	9877842	1
					274329	9877842	1
					275329	9877842	1
					276329	9877842	1
					277329	9877842	1
					278329	9877842	1
					279329	9877842	1
					280329	9877842	1
					281329	9877842	1
					282329	9877842	1
					283329	9877842	1
					284329	9877842	0
					285329	9877842	0
					243329	9878842	1
					244329	9878842	1
					245329	9878842	1
					246329	9878842	1
					247329	9878842	1
					248329	9878842	1
					249329	9878842	1
					250329	9878842	1
					251329	9878842	1
					252329	9878842	1
					253329	9878842	1
					254329	9878842	1
					255329	9878842	1
					256329	9878842	1
					257329	9878842	1
					258329	9878842	1
					259329	9878842	1
					260329	9878842	1
					261329	9878842	1
					262329	9878842	1
					263329	9878842	1
					264329	9878842	1
					265329	9878842	1
					266329	9878842	1
					267329	9878842	1
					268329	9878842	1
					269329	9878842	1
					270329	9878842	1
					271329	9878842	1
					272329	9878842	1
					273329	9878842	1
					274329	9878842	1
					275329	9878842	1
					276329	9878842	1
					277329	9878842	1
					278329	9878842	1
					279329	9878842	1
					280329	9878842	1
					281329	9878842	1
					282329	9878842	1
					283329	9878842	1
					284329	9878842	0
					285329	9878842	0
					243329	9879842	1
					244329	9879842	1
					245329	9879842	1
					246329	9879842	1
					247329	9879842	1
					248329	9879842	1
					249329	9879842	1
					250329	9879842	1
					251329	9879842	1
					252329	9879842	1
					253329	9879842	1
					254329	9879842	1
					255329	9879842	1
					256329	9879842	1
					257329	9879842	1
					258329	9879842	1
					259329	9879842	1
					260329	9879842	1
					261329	9879842	1
					262329	9879842	1
					263329	9879842	1
					264329	9879842	1
					265329	9879842	1
					266329	9879842	1
					267329	9879842	1
					268329	9879842	1
					269329	9879842	1
					270329	9879842	1
					271329	9879842	1
					272329	9879842	1
					273329	9879842	1
					274329	9879842	1
					275329	9879842	1
					276329	9879842	1
					277329	9879842	1
					278329	9879842	1
					279329	9879842	1
					280329	9879842	1
					281329	9879842	1
					282329	9879842	1
					283329	9879842	1
					284329	9879842	0
					285329	9879842	0
					243329	9880842	1
					244329	9880842	1
					245329	9880842	1
					246329	9880842	1
					247329	9880842	1
					248329	9880842	1
					249329	9880842	1
					250329	9880842	1
					251329	9880842	1
					252329	9880842	1
					253329	9880842	1
					254329	9880842	1
					255329	9880842	1
					256329	9880842	1
					257329	9880842	1
					258329	9880842	1
					259329	9880842	1
					260329	9880842	1
					261329	9880842	1
					262329	9880842	1
					263329	9880842	1
					264329	9880842	1
					265329	9880842	1
					266329	9880842	1
					267329	9880842	1
					268329	9880842	1
					269329	9880842	1
					270329	9880842	1
					271329	9880842	1
					272329	9880842	1
					273329	9880842	1
					274329	9880842	1
					275329	9880842	1
					276329	9880842	1
					277329	9880842	1
					278329	9880842	1
					279329	9880842	1
					280329	9880842	1
					281329	9880842	1
					282329	9880842	1
					283329	9880842	1
					284329	9880842	0
					285329	9880842	0
					243329	9881842	1
					244329	9881842	1
					245329	9881842	1
					246329	9881842	1
					247329	9881842	1
					248329	9881842	1
					249329	9881842	1
					250329	9881842	1
					251329	9881842	1
					252329	9881842	1
					253329	9881842	1
					254329	9881842	1
					255329	9881842	1
					256329	9881842	1
					257329	9881842	1
					258329	9881842	1
					259329	9881842	1
					260329	9881842	1
					261329	9881842	1
					262329	9881842	1
					263329	9881842	1
					264329	9881842	1
					265329	9881842	1
					266329	9881842	1
					267329	9881842	1
					268329	9881842	1
					269329	9881842	1
					270329	9881842	1
					271329	9881842	1
					272329	9881842	1
					273329	9881842	1
					274329	9881842	1
					275329	9881842	1
					276329	9881842	1
					277329	9881842	1
					278329	9881842	1
					279329	9881842	1
					280329	9881842	1
					281329	9881842	1
					282329	9881842	1
					283329	9881842	0
					284329	9881842	0
					285329	9881842	0
					243329	9882842	1
					244329	9882842	1
					245329	9882842	1
					246329	9882842	1
					247329	9882842	1
					248329	9882842	1
					249329	9882842	1
					250329	9882842	1
					251329	9882842	1
					252329	9882842	1
					253329	9882842	1
					254329	9882842	1
					255329	9882842	1
					256329	9882842	1
					257329	9882842	1
					258329	9882842	1
					259329	9882842	1
					260329	9882842	1
					261329	9882842	1
					262329	9882842	1
					263329	9882842	1
					264329	9882842	1
					265329	9882842	1
					266329	9882842	1
					267329	9882842	1
					268329	9882842	1
					269329	9882842	1
					270329	9882842	1
					271329	9882842	1
					272329	9882842	1
					273329	9882842	1
					274329	9882842	1
					275329	9882842	1
					276329	9882842	1
					277329	9882842	1
					278329	9882842	1
					279329	9882842	1
					280329	9882842	0
					281329	9882842	1
					282329	9882842	1
					283329	9882842	0
					284329	9882842	0
					285329	9882842	0
					243329	9883842	1
					244329	9883842	1
					245329	9883842	1
					246329	9883842	1
					247329	9883842	1
					248329	9883842	1
					249329	9883842	1
					250329	9883842	1
					251329	9883842	1
					252329	9883842	1
					253329	9883842	1
					254329	9883842	1
					255329	9883842	1
					256329	9883842	1
					257329	9883842	1
					258329	9883842	1
					259329	9883842	1
					260329	9883842	1
					261329	9883842	1
					262329	9883842	1
					263329	9883842	1
					264329	9883842	1
					265329	9883842	1
					266329	9883842	1
					267329	9883842	1
					268329	9883842	1
					269329	9883842	1
					270329	9883842	1
					271329	9883842	1
					272329	9883842	1
					273329	9883842	1
					274329	9883842	1
					275329	9883842	1
					276329	9883842	1
					277329	9883842	1
					278329	9883842	1
					279329	9883842	1
					280329	9883842	1
					281329	9883842	1
					282329	9883842	1
					283329	9883842	0
					284329	9883842	0
					285329	9883842	0
					243329	9884842	1
					244329	9884842	1
					245329	9884842	1
					246329	9884842	1
					247329	9884842	1
					248329	9884842	1
					249329	9884842	1
					250329	9884842	1
					251329	9884842	1
					252329	9884842	1
					253329	9884842	1
					254329	9884842	1
					255329	9884842	1
					256329	9884842	1
					257329	9884842	1
					258329	9884842	1
					259329	9884842	1
					260329	9884842	1
					261329	9884842	1
					262329	9884842	1
					263329	9884842	1
					264329	9884842	1
					265329	9884842	1
					266329	9884842	1
					267329	9884842	1
					268329	9884842	1
					269329	9884842	1
					270329	9884842	1
					271329	9884842	1
					272329	9884842	1
					273329	9884842	1
					274329	9884842	1
					275329	9884842	1
					276329	9884842	1
					277329	9884842	1
					278329	9884842	1
					279329	9884842	1
					280329	9884842	1
					281329	9884842	1
					282329	9884842	1
					283329	9884842	0
					284329	9884842	0
					285329	9884842	0
					243329	9885842	1
					244329	9885842	1
					245329	9885842	1
					246329	9885842	1
					247329	9885842	1
					248329	9885842	1
					249329	9885842	1
					250329	9885842	1
					251329	9885842	1
					252329	9885842	1
					253329	9885842	1
					254329	9885842	1
					255329	9885842	1
					256329	9885842	1
					257329	9885842	1
					258329	9885842	1
					259329	9885842	1
					260329	9885842	1
					261329	9885842	1
					262329	9885842	1
					263329	9885842	1
					264329	9885842	1
					265329	9885842	1
					266329	9885842	1
					267329	9885842	1
					268329	9885842	1
					269329	9885842	1
					270329	9885842	1
					271329	9885842	1
					272329	9885842	1
					273329	9885842	1
					274329	9885842	1
					275329	9885842	1
					276329	9885842	1
					277329	9885842	1
					278329	9885842	1
					279329	9885842	1
					280329	9885842	1
					281329	9885842	1
					282329	9885842	0
					283329	9885842	0
					284329	9885842	0
					285329	9885842	0
					243329	9886842	1
					244329	9886842	1
					245329	9886842	1
					246329	9886842	1
					247329	9886842	1
					248329	9886842	1
					249329	9886842	1
					250329	9886842	1
					251329	9886842	1
					252329	9886842	1
					253329	9886842	1
					254329	9886842	1
					255329	9886842	1
					256329	9886842	1
					257329	9886842	1
					258329	9886842	1
					259329	9886842	1
					260329	9886842	1
					261329	9886842	1
					262329	9886842	1
					263329	9886842	1
					264329	9886842	1
					265329	9886842	1
					266329	9886842	1
					267329	9886842	1
					268329	9886842	1
					269329	9886842	1
					270329	9886842	1
					271329	9886842	1
					272329	9886842	1
					273329	9886842	1
					274329	9886842	1
					275329	9886842	1
					276329	9886842	1
					277329	9886842	1
					278329	9886842	0
					279329	9886842	0
					280329	9886842	1
					281329	9886842	1
					282329	9886842	1
					283329	9886842	0
					284329	9886842	0
					285329	9886842	0
					243329	9887842	1
					244329	9887842	1
					245329	9887842	1
					246329	9887842	1
					247329	9887842	1
					248329	9887842	1
					249329	9887842	1
					250329	9887842	1
					251329	9887842	1
					252329	9887842	1
					253329	9887842	1
					254329	9887842	1
					255329	9887842	1
					256329	9887842	1
					257329	9887842	1
					258329	9887842	1
					259329	9887842	1
					260329	9887842	1
					261329	9887842	1
					262329	9887842	1
					263329	9887842	1
					264329	9887842	1
					265329	9887842	1
					266329	9887842	1
					267329	9887842	1
					268329	9887842	1
					269329	9887842	1
					270329	9887842	1
					271329	9887842	1
					272329	9887842	1
					273329	9887842	1
					274329	9887842	1
					275329	9887842	1
					276329	9887842	1
					277329	9887842	1
					278329	9887842	1
					279329	9887842	1
					280329	9887842	1
					281329	9887842	1
					282329	9887842	0
					283329	9887842	0
					284329	9887842	0
					285329	9887842	0
					243329	9888842	1
					244329	9888842	1
					245329	9888842	1
					246329	9888842	1
					247329	9888842	1
					248329	9888842	1
					249329	9888842	1
					250329	9888842	1
					251329	9888842	1
					252329	9888842	1
					253329	9888842	1
					254329	9888842	1
					255329	9888842	1
					256329	9888842	1
					257329	9888842	1
					258329	9888842	1
					259329	9888842	1
					260329	9888842	1
					261329	9888842	1
					262329	9888842	1
					263329	9888842	1
					264329	9888842	1
					265329	9888842	1
					266329	9888842	1
					267329	9888842	1
					268329	9888842	1
					269329	9888842	1
					270329	9888842	1
					271329	9888842	1
					272329	9888842	1
					273329	9888842	1
					274329	9888842	1
					275329	9888842	1
					276329	9888842	1
					277329	9888842	1
					278329	9888842	1
					279329	9888842	1
					280329	9888842	1
					281329	9888842	1
					282329	9888842	0
					283329	9888842	0
					284329	9888842	0
					285329	9888842	0
					243329	9889842	1
					244329	9889842	1
					245329	9889842	1
					246329	9889842	1
					247329	9889842	1
					248329	9889842	1
					249329	9889842	1
					250329	9889842	1
					251329	9889842	1
					252329	9889842	1
					253329	9889842	1
					254329	9889842	1
					255329	9889842	1
					256329	9889842	1
					257329	9889842	1
					258329	9889842	1
					259329	9889842	1
					260329	9889842	1
					261329	9889842	1
					262329	9889842	1
					263329	9889842	1
					264329	9889842	1
					265329	9889842	1
					266329	9889842	1
					267329	9889842	1
					268329	9889842	1
					269329	9889842	1
					270329	9889842	1
					271329	9889842	1
					272329	9889842	1
					273329	9889842	1
					274329	9889842	1
					275329	9889842	1
					276329	9889842	1
					277329	9889842	1
					278329	9889842	1
					279329	9889842	0
					280329	9889842	0
					281329	9889842	0
					282329	9889842	0
					283329	9889842	0
					284329	9889842	0
					285329	9889842	0
					243329	9890842	1
					244329	9890842	1
					245329	9890842	1
					246329	9890842	1
					247329	9890842	1
					248329	9890842	1
					249329	9890842	1
					250329	9890842	1
					251329	9890842	1
					252329	9890842	1
					253329	9890842	1
					254329	9890842	1
					255329	9890842	1
					256329	9890842	1
					257329	9890842	1
					258329	9890842	1
					259329	9890842	1
					260329	9890842	1
					261329	9890842	1
					262329	9890842	1
					263329	9890842	1
					264329	9890842	1
					265329	9890842	1
					266329	9890842	1
					267329	9890842	1
					268329	9890842	1
					269329	9890842	1
					270329	9890842	1
					271329	9890842	1
					272329	9890842	1
					273329	9890842	1
					274329	9890842	1
					275329	9890842	1
					276329	9890842	1
					277329	9890842	1
					278329	9890842	1
					279329	9890842	1
					280329	9890842	1
					281329	9890842	1
					282329	9890842	1
					283329	9890842	0
					284329	9890842	0
					285329	9890842	0
					243329	9891842	1
					244329	9891842	1
					245329	9891842	1
					246329	9891842	1
					247329	9891842	1
					248329	9891842	1
					249329	9891842	1
					250329	9891842	1
					251329	9891842	1
					252329	9891842	1
					253329	9891842	1
					254329	9891842	1
					255329	9891842	1
					256329	9891842	1
					257329	9891842	1
					258329	9891842	1
					259329	9891842	1
					260329	9891842	1
					261329	9891842	1
					262329	9891842	1
					263329	9891842	1
					264329	9891842	1
					265329	9891842	1
					266329	9891842	1
					267329	9891842	1
					268329	9891842	1
					269329	9891842	1
					270329	9891842	1
					271329	9891842	1
					272329	9891842	1
					273329	9891842	1
					274329	9891842	1
					275329	9891842	1
					276329	9891842	1
					277329	9891842	1
					278329	9891842	1
					279329	9891842	1
					280329	9891842	1
					281329	9891842	1
					282329	9891842	1
					283329	9891842	1
					284329	9891842	0
					285329	9891842	0
					243329	9892842	1
					244329	9892842	1
					245329	9892842	1
					246329	9892842	1
					247329	9892842	1
					248329	9892842	1
					249329	9892842	1
					250329	9892842	1
					251329	9892842	1
					252329	9892842	1
					253329	9892842	1
					254329	9892842	1
					255329	9892842	1
					256329	9892842	1
					257329	9892842	1
					258329	9892842	1
					259329	9892842	1
					260329	9892842	1
					261329	9892842	1
					262329	9892842	1
					263329	9892842	1
					264329	9892842	1
					265329	9892842	1
					266329	9892842	1
					267329	9892842	1
					268329	9892842	1
					269329	9892842	1
					270329	9892842	1
					271329	9892842	1
					272329	9892842	1
					273329	9892842	1
					274329	9892842	1
					275329	9892842	1
					276329	9892842	1
					277329	9892842	1
					278329	9892842	1
					279329	9892842	1
					280329	9892842	1
					281329	9892842	1
					282329	9892842	1
					283329	9892842	1
					284329	9892842	1
					285329	9892842	0
					243329	9893842	1
					244329	9893842	1
					245329	9893842	1
					246329	9893842	1
					247329	9893842	1
					248329	9893842	1
					249329	9893842	1
					250329	9893842	1
					251329	9893842	1
					252329	9893842	1
					253329	9893842	1
					254329	9893842	1
					255329	9893842	1
					256329	9893842	1
					257329	9893842	1
					258329	9893842	1
					259329	9893842	1
					260329	9893842	1
					261329	9893842	1
					262329	9893842	1
					263329	9893842	1
					264329	9893842	1
					265329	9893842	1
					266329	9893842	1
					267329	9893842	1
					268329	9893842	1
					269329	9893842	1
					270329	9893842	1
					271329	9893842	1
					272329	9893842	1
					273329	9893842	1
					274329	9893842	1
					275329	9893842	1
					276329	9893842	1
					277329	9893842	1
					278329	9893842	1
					279329	9893842	1
					280329	9893842	1
					281329	9893842	1
					282329	9893842	1
					283329	9893842	1
					284329	9893842	1
					285329	9893842	0
					243329	9894842	1
					244329	9894842	1
					245329	9894842	1
					246329	9894842	1
					247329	9894842	1
					248329	9894842	1
					249329	9894842	1
					250329	9894842	1
					251329	9894842	1
					252329	9894842	1
					253329	9894842	1
					254329	9894842	1
					255329	9894842	1
					256329	9894842	1
					257329	9894842	1
					258329	9894842	1
					259329	9894842	1
					260329	9894842	1
					261329	9894842	1
					262329	9894842	1
					263329	9894842	1
					264329	9894842	1
					265329	9894842	1
					266329	9894842	1
					267329	9894842	1
					268329	9894842	1
					269329	9894842	1
					270329	9894842	1
					271329	9894842	1
					272329	9894842	1
					273329	9894842	1
					274329	9894842	1
					275329	9894842	1
					276329	9894842	1
					277329	9894842	1
					278329	9894842	1
					279329	9894842	1
					280329	9894842	1
					281329	9894842	1
					282329	9894842	1
					283329	9894842	1
					284329	9894842	1
					285329	9894842	0
					243329	9895842	1
					244329	9895842	1
					245329	9895842	1
					246329	9895842	1
					247329	9895842	1
					248329	9895842	1
					249329	9895842	1
					250329	9895842	1
					251329	9895842	1
					252329	9895842	1
					253329	9895842	1
					254329	9895842	1
					255329	9895842	1
					256329	9895842	1
					257329	9895842	1
					258329	9895842	1
					259329	9895842	1
					260329	9895842	1
					261329	9895842	1
					262329	9895842	1
					263329	9895842	1
					264329	9895842	1
					265329	9895842	1
					266329	9895842	1
					267329	9895842	1
					268329	9895842	1
					269329	9895842	1
					270329	9895842	1
					271329	9895842	1
					272329	9895842	1
					273329	9895842	1
					274329	9895842	1
					275329	9895842	1
					276329	9895842	1
					277329	9895842	1
					278329	9895842	1
					279329	9895842	1
					280329	9895842	1
					281329	9895842	1
					282329	9895842	1
					283329	9895842	1
					284329	9895842	1
					285329	9895842	0
					244329	9896842	0
					245329	9896842	0
					246329	9896842	1
					247329	9896842	1
					248329	9896842	1
					249329	9896842	0
					250329	9896842	0
					251329	9896842	0
					252329	9896842	0
					253329	9896842	1
					254329	9896842	1
					255329	9896842	1
					256329	9896842	1
					257329	9896842	1
					258329	9896842	1
					259329	9896842	1
					260329	9896842	1
					261329	9896842	1
					262329	9896842	1
					263329	9896842	1
					264329	9896842	1
					265329	9896842	1
					266329	9896842	1
					267329	9896842	1
					268329	9896842	1
					269329	9896842	1
					270329	9896842	1
					271329	9896842	1
					272329	9896842	1
					273329	9896842	1
					274329	9896842	1
					275329	9896842	1
					276329	9896842	1
					277329	9896842	1
					278329	9896842	1
					279329	9896842	1
					280329	9896842	1
					281329	9896842	1
					282329	9896842	1
					283329	9896842	1
					284329	9896842	0
					285329	9896842	0
					244329	9897842	1
					245329	9897842	0
					246329	9897842	0
					247329	9897842	0
					248329	9897842	0
					249329	9897842	0
					250329	9897842	0
					251329	9897842	0
					252329	9897842	1
					253329	9897842	0
					254329	9897842	1
					255329	9897842	1
					256329	9897842	1
					257329	9897842	1
					258329	9897842	1
					259329	9897842	1
					260329	9897842	1
					261329	9897842	1
					262329	9897842	1
					263329	9897842	1
					264329	9897842	1
					265329	9897842	1
					266329	9897842	1
					267329	9897842	1
					268329	9897842	1
					269329	9897842	1
					270329	9897842	1
					271329	9897842	1
					272329	9897842	1
					273329	9897842	1
					274329	9897842	1
					275329	9897842	1
					276329	9897842	1
					277329	9897842	1
					278329	9897842	1
					279329	9897842	1
					280329	9897842	1
					281329	9897842	1
					282329	9897842	1
					283329	9897842	1
					284329	9897842	0
					285329	9897842	0
					244329	9898842	1
					245329	9898842	1
					246329	9898842	1
					247329	9898842	1
					248329	9898842	1
					249329	9898842	1
					250329	9898842	0
					251329	9898842	0
					252329	9898842	1
					253329	9898842	1
					254329	9898842	1
					255329	9898842	1
					256329	9898842	1
					257329	9898842	1
					258329	9898842	1
					259329	9898842	1
					260329	9898842	1
					261329	9898842	1
					262329	9898842	1
					263329	9898842	1
					264329	9898842	1
					265329	9898842	1
					266329	9898842	1
					267329	9898842	1
					268329	9898842	1
					269329	9898842	1
					270329	9898842	1
					271329	9898842	1
					272329	9898842	1
					273329	9898842	1
					274329	9898842	1
					275329	9898842	1
					276329	9898842	1
					277329	9898842	1
					278329	9898842	1
					279329	9898842	1
					280329	9898842	1
					281329	9898842	1
					282329	9898842	1
					283329	9898842	1
					284329	9898842	0
					245329	9899842	0
					246329	9899842	1
					247329	9899842	1
					248329	9899842	1
					249329	9899842	1
					250329	9899842	1
					251329	9899842	1
					252329	9899842	0
					253329	9899842	0
					254329	9899842	1
					255329	9899842	1
					256329	9899842	1
					257329	9899842	1
					258329	9899842	1
					259329	9899842	1
					260329	9899842	0
					261329	9899842	1
					262329	9899842	1
					263329	9899842	1
					264329	9899842	1
					265329	9899842	1
					266329	9899842	1
					267329	9899842	1
					268329	9899842	1
					269329	9899842	1
					270329	9899842	1
					271329	9899842	1
					272329	9899842	1
					273329	9899842	1
					274329	9899842	1
					275329	9899842	1
					276329	9899842	1
					277329	9899842	1
					278329	9899842	1
					279329	9899842	1
					280329	9899842	1
					281329	9899842	1
					282329	9899842	1
					283329	9899842	1
					284329	9899842	0
					245329	9900842	1
					246329	9900842	1
					247329	9900842	1
					248329	9900842	0
					249329	9900842	0
					250329	9900842	1
					251329	9900842	1
					252329	9900842	1
					253329	9900842	1
					254329	9900842	0
					255329	9900842	1
					256329	9900842	1
					257329	9900842	0
					258329	9900842	0
					259329	9900842	1
					260329	9900842	1
					261329	9900842	0
					262329	9900842	1
					263329	9900842	1
					264329	9900842	1
					265329	9900842	1
					266329	9900842	1
					267329	9900842	1
					268329	9900842	1
					269329	9900842	1
					270329	9900842	1
					271329	9900842	1
					272329	9900842	1
					273329	9900842	1
					274329	9900842	1
					275329	9900842	1
					276329	9900842	1
					277329	9900842	1
					278329	9900842	1
					279329	9900842	1
					280329	9900842	1
					281329	9900842	1
					282329	9900842	1
					283329	9900842	1
					246329	9901842	1
					247329	9901842	1
					248329	9901842	0
					249329	9901842	1
					250329	9901842	1
					251329	9901842	1
					252329	9901842	1
					253329	9901842	1
					254329	9901842	1
					255329	9901842	1
					256329	9901842	0
					257329	9901842	0
					258329	9901842	1
					259329	9901842	1
					260329	9901842	1
					261329	9901842	1
					262329	9901842	0
					263329	9901842	1
					264329	9901842	1
					265329	9901842	1
					266329	9901842	1
					267329	9901842	0
					268329	9901842	0
					269329	9901842	1
					270329	9901842	1
					271329	9901842	1
					272329	9901842	1
					273329	9901842	1
					274329	9901842	1
					275329	9901842	1
					276329	9901842	1
					277329	9901842	1
					278329	9901842	1
					279329	9901842	1
					280329	9901842	1
					281329	9901842	1
					282329	9901842	1
					247329	9902842	0
					248329	9902842	0
					249329	9902842	0
					250329	9902842	1
					251329	9902842	1
					252329	9902842	1
					253329	9902842	1
					254329	9902842	1
					255329	9902842	0
					256329	9902842	1
					257329	9902842	1
					258329	9902842	1
					259329	9902842	1
					260329	9902842	1
					261329	9902842	1
					262329	9902842	1
					263329	9902842	0
					264329	9902842	1
					265329	9902842	0
					266329	9902842	0
					267329	9902842	1
					268329	9902842	0
					269329	9902842	1
					270329	9902842	1
					271329	9902842	1
					272329	9902842	1
					273329	9902842	1
					274329	9902842	1
					275329	9902842	1
					276329	9902842	1
					277329	9902842	1
					278329	9902842	1
					279329	9902842	1
					280329	9902842	1
					281329	9902842	1
					248329	9903842	0
					249329	9903842	0
					250329	9903842	1
					251329	9903842	1
					252329	9903842	1
					253329	9903842	0
					254329	9903842	0
					255329	9903842	1
					256329	9903842	1
					257329	9903842	0
					258329	9903842	0
					259329	9903842	1
					260329	9903842	1
					261329	9903842	1
					262329	9903842	1
					263329	9903842	1
					264329	9903842	0
					265329	9903842	1
					266329	9903842	1
					267329	9903842	1
					268329	9903842	1
					269329	9903842	1
					270329	9903842	0
					271329	9903842	1
					272329	9903842	1
					273329	9903842	0
					274329	9903842	1
					275329	9903842	1
					276329	9903842	1
					277329	9903842	1
					278329	9903842	1
					279329	9903842	1
					280329	9903842	1
					249329	9904842	0
					250329	9904842	0
					251329	9904842	0
					252329	9904842	0
					253329	9904842	0
					254329	9904842	0
					255329	9904842	1
					256329	9904842	0
					257329	9904842	0
					258329	9904842	1
					259329	9904842	0
					260329	9904842	1
					261329	9904842	1
					262329	9904842	1
					263329	9904842	1
					264329	9904842	0
					265329	9904842	1
					266329	9904842	1
					267329	9904842	1
					268329	9904842	0
					269329	9904842	1
					270329	9904842	1
					271329	9904842	1
					272329	9904842	1
					273329	9904842	0
					274329	9904842	1
					275329	9904842	1
					276329	9904842	1
					277329	9904842	1
					278329	9904842	1
					279329	9904842	1
					251329	9905842	0
					252329	9905842	0
					253329	9905842	0
					254329	9905842	0
					255329	9905842	0
					256329	9905842	1
					257329	9905842	0
					258329	9905842	1
					259329	9905842	1
					260329	9905842	0
					261329	9905842	0
					262329	9905842	1
					263329	9905842	1
					264329	9905842	0
					265329	9905842	0
					266329	9905842	1
					267329	9905842	1
					268329	9905842	1
					269329	9905842	1
					270329	9905842	1
					271329	9905842	1
					272329	9905842	0
					273329	9905842	0
					274329	9905842	1
					275329	9905842	1
					276329	9905842	1
					277329	9905842	1
					278329	9905842	1
					253329	9906842	0
					254329	9906842	0
					255329	9906842	0
					256329	9906842	0
					257329	9906842	1
					258329	9906842	1
					259329	9906842	1
					260329	9906842	1
					261329	9906842	1
					262329	9906842	1
					263329	9906842	0
					264329	9906842	1
					265329	9906842	1
					266329	9906842	1
					267329	9906842	1
					268329	9906842	1
					269329	9906842	0
					270329	9906842	0
					271329	9906842	0
					272329	9906842	0
					273329	9906842	1
					274329	9906842	1
					275329	9906842	1
[truncated: 53 more columns]

## Sheet: SECR-Maxus Road
Data for SECR analysis*: Maxus Road site
*Data is in the format required to be used with R Package SPACECAP
Capture history matrix					Potential home rance centers matrix					Trap deployment matrix
LOC_ID	ANIMAL_ID	SO			X_COORD	Y_COORD	HABITAT			LOC_ID	X_COORD	Y_COORD	1	2	3	4	5	6	7	8	9	10	11	12	13	14	15	16	17	18	19	20	21	22	23	24	25	26	27	28	29	30	31	32	33	34	35	36	37
11	1	2			329285	9906180	1			1	337480	9922953	1	1	1	1	1	1	1	1	1	1	1	1	1	1	1	1	1	1	1	1	1	1	1	1	1	1	1	1	1	1	1	1	1	1	1	1	1
13	1	40			330285	9906180	1			2	344160	9926013	1	1	1	1	1	1	1	1	1	1	1	1	1	1	1	1	1	1	1	1	1	1	1	1	1	1	1	1	1	1	0	0	0	0	1	1	1
24	2	28			331285	9906180	1			3	335852	9931877	1	1	1	1	1	1	1	1	1	1	1	1	1	1	1	1	1	1	1	1	1	1	1	1	1	1	1	1	1	1	1	1	1	1	1	1	1
23	2	83			332285	9906180	1			4	333442	9930948	1	1	1	1	1	1	1	1	1	1	1	1	1	1	1	1	1	1	1	1	1	1	1	1	1	1	1	1	1	1	1	1	1	1	1	1	1
2	2	86			333285	9906180	1			5	339448	9922773	1	1	1	1	1	1	1	1	1	1	1	1	1	1	1	1	1	1	1	1	1	1	1	1	1	1	1	1	1	1	1	1	1	1	1	1	1
5	3	24			334285	9906180	1			6	339970	9920680	1	1	1	1	1	1	1	1	1	1	1	1	1	1	1	1	1	1	1	1	1	1	1	1	1	1	1	1	1	1	1	1	1	1	1	1	1
13	3	60			335285	9906180	1			7	341904	9922718	1	1	1	1	1	1	1	1	1	1	1	1	1	1	1	1	1	1	1	1	1	1	1	1	1	1	1	1	1	1	0	0	0	0	1	1	1
					336285	9906180	1			8	342840	9921083	1	1	1	1	1	1	1	1	1	1	1	1	1	1	1	1	1	1	1	1	1	1	1	1	1	1	1	1	1	1	1	1	1	1	1	1	1
					337285	9906180	1			9	337848	9930249	1	1	1	1	1	1	1	1	1	1	1	1	1	1	1	1	1	1	1	1	1	1	1	1	1	1	1	1	1	1	1	1	1	1	1	1	1
					338285	9906180	1			10	339954	9931017	1	1	1	1	1	1	1	1	1	1	1	1	1	1	1	1	1	1	1	1	1	1	1	1	1	1	1	1	1	1	1	1	1	1	1	1	1
					339285	9906180	1			11	335250	9929305	1	1	1	1	1	1	1	1	1	1	1	1	1	1	1	1	1	1	1	1	1	1	1	1	1	1	1	1	1	1	1	1	1	1	1	1	1
					340285	9906180	1			12	332785	9928470	1	1	1	1	1	1	1	1	1	1	1	1	1	1	1	1	1	1	1	1	1	1	1	1	1	1	1	1	1	1	1	1	1	1	1	1	1
					341285	9906180	1			13	335086	9923296	1	1	1	1	1	1	1	1	1	1	1	1	1	1	1	1	1	1	1	1	1	1	1	1	1	1	1	1	1	1	1	1	1	1	1	1	1
					342285	9906180	1			14	337846	9932720	1	1	1	1	1	1	1	1	1	1	1	1	1	1	1	1	1	1	1	1	1	1	1	1	1	0	0	0	0	0	0	0	0	0	0	0	0
					343285	9906180	1			15	341532	9925360	1	1	1	1	1	1	1	1	1	1	1	1	1	1	1	1	1	1	1	1	1	1	1	1	1	1	1	1	1	1	1	1	1	1	1	1	1
					344285	9906180	1			16	341538	9925869	1	1	1	1	1	1	1	1	1	1	1	1	1	1	1	1	1	1	1	1	1	1	1	1	1	1	1	1	1	1	1	1	1	1	1	1	1
					345285	9906180	1			17	339998	9928006	1	1	1	1	1	1	1	1	1	1	1	1	1	1	1	1	1	1	1	1	1	1	1	1	1	1	1	1	1	1	1	1	1	1	1	1	1
					346285	9906180	1			18	342132	9929724	1	1	1	1	1	1	1	1	1	1	1	1	1	1	1	1	1	1	1	1	1	1	1	1	1	1	1	1	1	1	1	0	0	1	1	1	1
					347285	9906180	1			19	337237	9927548	1	1	1	1	1	1	1	1	1	1	1	1	1	1	1	1	1	1	1	1	1	1	1	1	1	1	1	1	1	1	0	0	0	0	0	0	0
					348285	9906180	1			20	334557	9926928	1	1	1	1	1	1	1	1	1	1	1	1	1	1	1	1	1	1	1	1	1	1	1	1	1	1	1	1	1	1	1	1	1	1	1	1	1
					349285	9906180	1			21	345882	9923482	1	1	1	1	1	1	1	1	1	1	1	1	1	1	1	1	1	1	1	1	1	1	1	1	1	1	1	1	1	1	1	1	1	1	1	1	1
					350285	9906180	1			22	347149	9921241	1	1	1	1	1	1	1	1	1	1	1	1	1	1	1	1	1	1	1	1	1	1	1	1	1	1	0	0	0	0	0	0	0	0	1	1	1
					326285	9907180	1			23	343868	9923146	1	1	1	1	1	1	1	1	1	1	1	1	1	1	1	1	1	1	1	1	1	1	1	1	1	1	1	1	1	1	1	1	1	1	1	1	1
					327285	9907180	1			24	345004	9921029	1	1	1	1	1	1	1	1	1	1	1	1	1	1	1	1	1	1	1	1	1	1	1	1	1	1	1	1	1	1	1	1	1	1	1	1	1
					328285	9907180	1			25	338867	9925150	1	1	1	1	1	1	1	1	1	1	1	1	1	1	1	1	1	1	1	1	1	1	1	1	1	1	1	1	1	1	1	1	1	1	1	1	1
					329285	9907180	1			26	336909	9925372	1	1	1	1	1	1	1	1	1	1	1	1	1	1	1	1	1	1	1	1	1	1	1	1	1	1	1	1	1	1	1	1	1	1	1	1	1
					330285	9907180	1
					331285	9907180	1
					332285	9907180	1
					333285	9907180	1
					334285	9907180	1
					335285	9907180	1
					336285	9907180	1
					337285	9907180	1
					338285	9907180	1
					339285	9907180	1
					340285	9907180	1
					341285	9907180	1
					342285	9907180	1
					343285	9907180	1
					344285	9907180	1
					345285	9907180	1
					346285	9907180	1
					347285	9907180	1
					348285	9907180	1
					349285	9907180	1
					350285	9907180	1
					351285	9907180	1
					352285	9907180	1
					353285	9907180	1
					325285	9908180	1
					326285	9908180	1
					327285	9908180	1
					328285	9908180	1
					329285	9908180	1
					330285	9908180	1
					331285	9908180	1
					332285	9908180	1
					333285	9908180	1
					334285	9908180	1
					335285	9908180	1
					336285	9908180	1
					337285	9908180	1
					338285	9908180	1
					339285	9908180	1
					340285	9908180	1
					341285	9908180	1
					342285	9908180	1
					343285	9908180	1
					344285	9908180	1
					345285	9908180	1
					346285	9908180	1
					347285	9908180	1
					348285	9908180	1
					349285	9908180	1
					350285	9908180	1
					351285	9908180	1
					352285	9908180	1
					353285	9908180	1
					354285	9908180	1
					355285	9908180	1
					323285	9909180	1
					324285	9909180	1
					325285	9909180	1
					326285	9909180	1
					327285	9909180	1
					328285	9909180	1
					329285	9909180	1
					330285	9909180	1
					331285	9909180	1
					332285	9909180	1
					333285	9909180	1
					334285	9909180	1
					335285	9909180	1
					336285	9909180	1
					337285	9909180	1
					338285	9909180	1
					339285	9909180	1
					340285	9909180	1
					341285	9909180	1
					342285	9909180	1
					343285	9909180	1
					344285	9909180	1
					345285	9909180	1
					346285	9909180	1
					347285	9909180	1
					348285	9909180	1
					349285	9909180	1
					350285	9909180	1
					351285	9909180	1
					352285	9909180	1
					353285	9909180	1
					354285	9909180	1
					355285	9909180	1
					356285	9909180	1
					322285	9910180	1
					323285	9910180	1
					324285	9910180	1
					325285	9910180	1
					326285	9910180	1
					327285	9910180	1
					328285	9910180	1
					329285	9910180	1
					330285	9910180	1
					331285	9910180	1
					332285	9910180	1
					333285	9910180	1
					334285	9910180	1
					335285	9910180	1
					336285	9910180	1
					337285	9910180	1
					338285	9910180	1
					339285	9910180	1
					340285	9910180	1
					341285	9910180	1
					342285	9910180	1
					343285	9910180	1
					344285	9910180	1
					345285	9910180	1
					346285	9910180	1
					347285	9910180	1
					348285	9910180	1
					349285	9910180	1
					350285	9910180	1
					351285	9910180	1
					352285	9910180	1
					353285	9910180	1
					354285	9910180	1
					355285	9910180	1
					356285	9910180	1
					357285	9910180	1
					321285	9911180	1
					322285	9911180	1
					323285	9911180	1
					324285	9911180	1
					325285	9911180	1
					326285	9911180	1
					327285	9911180	1
					328285	9911180	1
					329285	9911180	1
					330285	9911180	1
					331285	9911180	1
					332285	9911180	1
					333285	9911180	1
					334285	9911180	1
					335285	9911180	1
					336285	9911180	1
					337285	9911180	1
					338285	9911180	1
					339285	9911180	1
					340285	9911180	1
					341285	9911180	1
					342285	9911180	1
					343285	9911180	1
					344285	9911180	1
					345285	9911180	1
					346285	9911180	1
					347285	9911180	1
					348285	9911180	1
					349285	9911180	1
					350285	9911180	1
					351285	9911180	1
					352285	9911180	1
					353285	9911180	1
					354285	9911180	1
					355285	9911180	1
					356285	9911180	1
					357285	9911180	1
					358285	9911180	1
					321285	9912180	1
					322285	9912180	1
					323285	9912180	1
					324285	9912180	1
					325285	9912180	1
					326285	9912180	1
					327285	9912180	1
					328285	9912180	1
					329285	9912180	1
					330285	9912180	1
					331285	9912180	1
					332285	9912180	1
					333285	9912180	1
					334285	9912180	1
					335285	9912180	1
					336285	9912180	1
					337285	9912180	1
					338285	9912180	1
					339285	9912180	1
					340285	9912180	1
					341285	9912180	1
					342285	9912180	1
					343285	9912180	1
					344285	9912180	1
					345285	9912180	1
					346285	9912180	1
					347285	9912180	1
					348285	9912180	1
					349285	9912180	1
					350285	9912180	1
					351285	9912180	1
					352285	9912180	1
					353285	9912180	1
					354285	9912180	1
					355285	9912180	1
					356285	9912180	1
					357285	9912180	1
					358285	9912180	1
					359285	9912180	1
					320285	9913180	1
					321285	9913180	1
					322285	9913180	1
					323285	9913180	1
					324285	9913180	1
					325285	9913180	1
					326285	9913180	1
					327285	9913180	1
					328285	9913180	1
					329285	9913180	1
					330285	9913180	1
					331285	9913180	1
					332285	9913180	1
					333285	9913180	1
					334285	9913180	1
					335285	9913180	1
					336285	9913180	1
					337285	9913180	1
					338285	9913180	1
					339285	9913180	1
					340285	9913180	1
					341285	9913180	1
					342285	9913180	1
					343285	9913180	1
					344285	9913180	1
					345285	9913180	1
					346285	9913180	1
					347285	9913180	1
					348285	9913180	1
					349285	9913180	1
					350285	9913180	1
					351285	9913180	1
					352285	9913180	1
					353285	9913180	1
					354285	9913180	1
					355285	9913180	1
					356285	9913180	1
					357285	9913180	1
					358285	9913180	1
					359285	9913180	1
					319285	9914180	1
					320285	9914180	1
					321285	9914180	1
					322285	9914180	1
					323285	9914180	1
					324285	9914180	1
					325285	9914180	1
					326285	9914180	1
					327285	9914180	1
					328285	9914180	1
					329285	9914180	1
					330285	9914180	1
					331285	9914180	1
					332285	9914180	1
					333285	9914180	1
					334285	9914180	1
					335285	9914180	1
					336285	9914180	1
					337285	9914180	1
					338285	9914180	1
					339285	9914180	1
					340285	9914180	1
					341285	9914180	1
					342285	9914180	1
					343285	9914180	1
					344285	9914180	1
					345285	9914180	1
					346285	9914180	1
					347285	9914180	1
					348285	9914180	1
					349285	9914180	1
					350285	9914180	1
					351285	9914180	1
					352285	9914180	1
					353285	9914180	1
					354285	9914180	1
					355285	9914180	1
					356285	9914180	1
					357285	9914180	1
					358285	9914180	1
					359285	9914180	1
					360285	9914180	1
					319285	9915180	1
					320285	9915180	1
					321285	9915180	1
					322285	9915180	1
					323285	9915180	1
					324285	9915180	1
					325285	9915180	1
					326285	9915180	1
					327285	9915180	1
					328285	9915180	1
					329285	9915180	1
					330285	9915180	1
					331285	9915180	1
					332285	9915180	1
					333285	9915180	1
					334285	9915180	1
					335285	9915180	1
					336285	9915180	1
					337285	9915180	1
					338285	9915180	1
					339285	9915180	1
					340285	9915180	1
					341285	9915180	1
					342285	9915180	1
					343285	9915180	1
					344285	9915180	1
					345285	9915180	1
					346285	9915180	1
					347285	9915180	1
					348285	9915180	1
					349285	9915180	1
					350285	9915180	1
					351285	9915180	1
					352285	9915180	1
					353285	9915180	1
					354285	9915180	1
					355285	9915180	1
					356285	9915180	1
					357285	9915180	1
					358285	9915180	1
					359285	9915180	1
					360285	9915180	1
					319285	9916180	1
					320285	9916180	1
					321285	9916180	1
					322285	9916180	1
					323285	9916180	1
					324285	9916180	1
					325285	9916180	1
					326285	9916180	1
					327285	9916180	1
					328285	9916180	1
					329285	9916180	1
					330285	9916180	1
					331285	9916180	1
					332285	9916180	1
					333285	9916180	1
					334285	9916180	1
					335285	9916180	1
					336285	9916180	1
					337285	9916180	1
					338285	9916180	1
					339285	9916180	1
					340285	9916180	1
					341285	9916180	1
					342285	9916180	1
					343285	9916180	1
					344285	9916180	1
					345285	9916180	1
					346285	9916180	1
					347285	9916180	1
					348285	9916180	1
					349285	9916180	1
					350285	9916180	1
					351285	9916180	1
					352285	9916180	1
					353285	9916180	1
					354285	9916180	1
					355285	9916180	1
					356285	9916180	1
					357285	9916180	1
					358285	9916180	1
					359285	9916180	1
					360285	9916180	1
					361285	9916180	1
					318285	9917180	1
					319285	9917180	1
					320285	9917180	1
					321285	9917180	1
					322285	9917180	1
					323285	9917180	1
					324285	9917180	1
					325285	9917180	1
					326285	9917180	1
					327285	9917180	1
					328285	9917180	1
					329285	9917180	1
					330285	9917180	1
					331285	9917180	1
					332285	9917180	1
					333285	9917180	1
					334285	9917180	1
					335285	9917180	1
					336285	9917180	1
					337285	9917180	1
					338285	9917180	1
					339285	9917180	1
					340285	9917180	1
					341285	9917180	1
					342285	9917180	1
					343285	9917180	1
					344285	9917180	1
					345285	9917180	1
					346285	9917180	1
					347285	9917180	1
					348285	9917180	1
					349285	9917180	1
					350285	9917180	1
					351285	9917180	1
					352285	9917180	1
					353285	9917180	1
					354285	9917180	1
					355285	9917180	1
					356285	9917180	1
					357285	9917180	1
					358285	9917180	1
					359285	9917180	1
					360285	9917180	1
					361285	9917180	1
					318285	9918180	1
					319285	9918180	1
					320285	9918180	1
					321285	9918180	1
					322285	9918180	1
					323285	9918180	1
					324285	9918180	1
					325285	9918180	1
					326285	9918180	1
					327285	9918180	1
					328285	9918180	1
					329285	9918180	1
					330285	9918180	1
					331285	9918180	1
					332285	9918180	1
					333285	9918180	1
					334285	9918180	1
					335285	9918180	1
					336285	9918180	1
					337285	9918180	1
					338285	9918180	1
					339285	9918180	1
					340285	9918180	1
					341285	9918180	1
					342285	9918180	1
					343285	9918180	1
					344285	9918180	1
					345285	9918180	1
					346285	9918180	1
					347285	9918180	1
					348285	9918180	1
					349285	9918180	1
					350285	9918180	1
					351285	9918180	1
					352285	9918180	1
					353285	9918180	1
					354285	9918180	1
					355285	9918180	1
					356285	9918180	1
					357285	9918180	1
					358285	9918180	1
					359285	9918180	1
					360285	9918180	1
					361285	9918180	1
					318285	9919180	1
					319285	9919180	1
					320285	9919180	1
					321285	9919180	1
					322285	9919180	1
					323285	9919180	1
					324285	9919180	1
					325285	9919180	1
					326285	9919180	1
					327285	9919180	1
					328285	9919180	1
					329285	9919180	1
					330285	9919180	1
					331285	9919180	1
					332285	9919180	1
					333285	9919180	1
					334285	9919180	1
					335285	9919180	1
					336285	9919180	1
					337285	9919180	1
					338285	9919180	1
					339285	9919180	1
					340285	9919180	1
					341285	9919180	1
					342285	9919180	1
					343285	9919180	1
					344285	9919180	1
					345285	9919180	1
					346285	9919180	1
					347285	9919180	1
					348285	9919180	1
					349285	9919180	1
					350285	9919180	1
					351285	9919180	1
					352285	9919180	1
					353285	9919180	1
					354285	9919180	1
					355285	9919180	1
					356285	9919180	1
					357285	9919180	1
					358285	9919180	1
					359285	9919180	1
					360285	9919180	1
					361285	9919180	1
					318285	9920180	1
					319285	9920180	1
					320285	9920180	1
					321285	9920180	1
					322285	9920180	1
					323285	9920180	1
					324285	9920180	1
					325285	9920180	1
					326285	9920180	1
					327285	9920180	1
					328285	9920180	1
					329285	9920180	1
					330285	9920180	1
					331285	9920180	1
					332285	9920180	1
					333285	9920180	1
					334285	9920180	1
					335285	9920180	1
					336285	9920180	1
					337285	9920180	1
					338285	9920180	1
					339285	9920180	1
					340285	9920180	1
					341285	9920180	1
					342285	9920180	1
					343285	9920180	1
					344285	9920180	1
					345285	9920180	1
					346285	9920180	1
					347285	9920180	1
					348285	9920180	1
					349285	9920180	1
					350285	9920180	1
					351285	9920180	1
					352285	9920180	1
					353285	9920180	1
					354285	9920180	1
					355285	9920180	1
					356285	9920180	1
					357285	9920180	1
					358285	9920180	1
					359285	9920180	1
					360285	9920180	1
					361285	9920180	1
					318285	9921180	1
					319285	9921180	1
					320285	9921180	1
					321285	9921180	1
					322285	9921180	1
					323285	9921180	1
					324285	9921180	1
					325285	9921180	1
					326285	9921180	1
					327285	9921180	1
					328285	9921180	1
					329285	9921180	1
					330285	9921180	1
					331285	9921180	1
					332285	9921180	1
					333285	9921180	1
					334285	9921180	1
					335285	9921180	1
					336285	9921180	1
					337285	9921180	1
					338285	9921180	1
					339285	9921180	1
					340285	9921180	1
					341285	9921180	1
					342285	9921180	1
					343285	9921180	1
					344285	9921180	1
					345285	9921180	1
					346285	9921180	1
					347285	9921180	1
					348285	9921180	1
					349285	9921180	1
					350285	9921180	1
					351285	9921180	1
					352285	9921180	1
					353285	9921180	1
					354285	9921180	1
					355285	9921180	1
					356285	9921180	1
					357285	9921180	1
					358285	9921180	1
					359285	9921180	1
					360285	9921180	1
					361285	9921180	1
					318285	9922180	1
					319285	9922180	1
					320285	9922180	1
					321285	9922180	1
					322285	9922180	1
					323285	9922180	1
					324285	9922180	1
					325285	9922180	1
					326285	9922180	1
					327285	9922180	1
					328285	9922180	1
					329285	9922180	1
					330285	9922180	1
					331285	9922180	1
					332285	9922180	1
					333285	9922180	1
					334285	9922180	1
					335285	9922180	1
					336285	9922180	1
					337285	9922180	1
					338285	9922180	1
					339285	9922180	1
					340285	9922180	1
					341285	9922180	1
					342285	9922180	1
					343285	9922180	1
					344285	9922180	1
					345285	9922180	1
					346285	9922180	1
					347285	9922180	1
					348285	9922180	1
					349285	9922180	1
					350285	9922180	1
					351285	9922180	1
					352285	9922180	1
					353285	9922180	1
					354285	9922180	1
					355285	9922180	1
					356285	9922180	1
					357285	9922180	1
					358285	9922180	1
					359285	9922180	1
					360285	9922180	1
					361285	9922180	1
					318285	9923180	1
					319285	9923180	1
					320285	9923180	1
					321285	9923180	1
					322285	9923180	1
					323285	9923180	1
					324285	9923180	1
					325285	9923180	1
					326285	9923180	1
					327285	9923180	1
					328285	9923180	1
					329285	9923180	1
					330285	9923180	1
					331285	9923180	1
					332285	9923180	1
					333285	9923180	1
					334285	9923180	1
					335285	9923180	1
					336285	9923180	1
					337285	9923180	1
					338285	9923180	1
					339285	9923180	1
					340285	9923180	1
					341285	9923180	1
					342285	9923180	1
					343285	9923180	1
					344285	9923180	1
					345285	9923180	1
					346285	9923180	1
					347285	9923180	1
					348285	9923180	1
					349285	9923180	1
					350285	9923180	1
					351285	9923180	1
					352285	9923180	1
					353285	9923180	1
					354285	9923180	1
					355285	9923180	1
					356285	9923180	1
					357285	9923180	1
					358285	9923180	1
					359285	9923180	1
					360285	9923180	1
					361285	9923180	1
					318285	9924180	1
					319285	9924180	1
					320285	9924180	1
					321285	9924180	1
					322285	9924180	1
					323285	9924180	1
					324285	9924180	1
					325285	9924180	1
					326285	9924180	1
					327285	9924180	1
					328285	9924180	1
					329285	9924180	1
					330285	9924180	1
					331285	9924180	1
					332285	9924180	1
					333285	9924180	1
					334285	9924180	1
					335285	9924180	1
					336285	9924180	1
					337285	9924180	1
					338285	9924180	1
					339285	9924180	1
					340285	9924180	1
					341285	9924180	1
					342285	9924180	1
					343285	9924180	1
					344285	9924180	1
					345285	9924180	1
					346285	9924180	1
					347285	9924180	1
					348285	9924180	1
					349285	9924180	1
					350285	9924180	1
					351285	9924180	1
					352285	9924180	1
					353285	9924180	1
					354285	9924180	1
					355285	9924180	1
					356285	9924180	1
					357285	9924180	1
					358285	9924180	1
					359285	9924180	1
					360285	9924180	1
					361285	9924180	1
					318285	9925180	1
					319285	9925180	1
					320285	9925180	1
					321285	9925180	1
					322285	9925180	1
					323285	9925180	1
					324285	9925180	1
					325285	9925180	1
					326285	9925180	1
					327285	9925180	1
					328285	9925180	1
					329285	9925180	1
					330285	9925180	1
					331285	9925180	1
					332285	9925180	1
					333285	9925180	1
					334285	9925180	1
					335285	9925180	1
					336285	9925180	1
					337285	9925180	1
					338285	9925180	1
					339285	9925180	1
					340285	9925180	1
					341285	9925180	1
					342285	9925180	1
					343285	9925180	1
					344285	9925180	1
					345285	9925180	1
					346285	9925180	1
					347285	9925180	1
					348285	9925180	1
					349285	9925180	1
					350285	9925180	1
					351285	9925180	1
					352285	9925180	1
					353285	9925180	1
					354285	9925180	1
					355285	9925180	1
					356285	9925180	1
					357285	9925180	1
					358285	9925180	1
					359285	9925180	1
					360285	9925180	1
					361285	9925180	1
					318285	9926180	1
					319285	9926180	1
					320285	9926180	1
					321285	9926180	1
					322285	9926180	1
					323285	9926180	1
					324285	9926180	1
					325285	9926180	1
					326285	9926180	1
					327285	9926180	1
					328285	9926180	1
					329285	9926180	1
					330285	9926180	1
					331285	9926180	1
					332285	9926180	1
					333285	9926180	1
					334285	9926180	1
					335285	9926180	1
					336285	9926180	1
					337285	9926180	1
					338285	9926180	1
					339285	9926180	1
					340285	9926180	1
					341285	9926180	1
					342285	9926180	1
					343285	9926180	1
					344285	9926180	1
					345285	9926180	1
					346285	9926180	1
					347285	9926180	1
					348285	9926180	1
					349285	9926180	1
					350285	9926180	1
					351285	9926180	1
					352285	9926180	1
					353285	9926180	1
					354285	9926180	1
					355285	9926180	1
					356285	9926180	1
					357285	9926180	1
					358285	9926180	1
					359285	9926180	1
					360285	9926180	1
					361285	9926180	1
					318285	9927180	1
					319285	9927180	1
					320285	9927180	1
					321285	9927180	1
					322285	9927180	1
					323285	9927180	1
					324285	9927180	1
					325285	9927180	1
					326285	9927180	1
					327285	9927180	1
					328285	9927180	1
					329285	9927180	1
					330285	9927180	1
					331285	9927180	1
					332285	9927180	1
					333285	9927180	1
					334285	9927180	1
					335285	9927180	1
					336285	9927180	1
					337285	9927180	1
					338285	9927180	1
					339285	9927180	1
					340285	9927180	1
					341285	9927180	1
					342285	9927180	1
					343285	9927180	1
					344285	9927180	1
					345285	9927180	1
					346285	9927180	1
					347285	9927180	1
					348285	9927180	1
					349285	9927180	1
					350285	9927180	1
					351285	9927180	1
					352285	9927180	1
					353285	9927180	1
					354285	9927180	1
					355285	9927180	1
					356285	9927180	1
					357285	9927180	1
					358285	9927180	1
					359285	9927180	1
					360285	9927180	1
					361285	9927180	1
					318285	9928180	1
					319285	9928180	1
					320285	9928180	1
					321285	9928180	1
					322285	9928180	1
					323285	9928180	1
					324285	9928180	1
					325285	9928180	1
					326285	9928180	1
					327285	9928180	1
					328285	9928180	1
					329285	9928180	1
					330285	9928180	1
					331285	9928180	1
					332285	9928180	1
					333285	9928180	1
					334285	9928180	1
					335285	9928180	1
					336285	9928180	1
					337285	9928180	1
					338285	9928180	1
					339285	9928180	1
					340285	9928180	1
					341285	9928180	1
					342285	9928180	1
					343285	9928180	1
					344285	9928180	1
					345285	9928180	1
					346285	9928180	1
					347285	9928180	1
					348285	9928180	1
					349285	9928180	1
					350285	9928180	1
					351285	9928180	1
					352285	9928180	1
					353285	9928180	1
					354285	9928180	1
					355285	9928180	1
					356285	9928180	1
					357285	9928180	1
					358285	9928180	1
					359285	9928180	1
					360285	9928180	1
					361285	9928180	1
					318285	9929180	1
					319285	9929180	1
					320285	9929180	1
					321285	9929180	1
					322285	9929180	1
					323285	9929180	1
					324285	9929180	1
					325285	9929180	1
					326285	9929180	1
					327285	9929180	1
					328285	9929180	1
					329285	9929180	1
					330285	9929180	1
					331285	9929180	1
					332285	9929180	1
					333285	9929180	1
					334285	9929180	1
					335285	9929180	1
					336285	9929180	1
					337285	9929180	1
					338285	9929180	1
					339285	9929180	1
					340285	9929180	1
					341285	9929180	1
					342285	9929180	1
					343285	9929180	1
					344285	9929180	1
					345285	9929180	1
					346285	9929180	1
					347285	9929180	1
					348285	9929180	1
					349285	9929180	1
					350285	9929180	1
					351285	9929180	1
					352285	9929180	1
					353285	9929180	1
					354285	9929180	1
					355285	9929180	1
					356285	9929180	1
					357285	9929180	1
					358285	9929180	1
					359285	9929180	1
					360285	9929180	1
					361285	9929180	1
					318285	9930180	1
					319285	9930180	1
					320285	9930180	1
					321285	9930180	1
					322285	9930180	1
					323285	9930180	1
					324285	9930180	1
					325285	9930180	1
					326285	9930180	1
					327285	9930180	1
					328285	9930180	1
					329285	9930180	1
					330285	9930180	1
					331285	9930180	1
					332285	9930180	1
					333285	9930180	1
					334285	9930180	1
					335285	9930180	1
					336285	9930180	1
					337285	9930180	1
					338285	9930180	1
					339285	9930180	1
					340285	9930180	1
					341285	9930180	1
					342285	9930180	1
					343285	9930180	1
					344285	9930180	1
					345285	9930180	1
					346285	9930180	1
					347285	9930180	1
					348285	9930180	1
					349285	9930180	1
					350285	9930180	1
					351285	9930180	1
					352285	9930180	1
					353285	9930180	1
					354285	9930180	1
					355285	9930180	1
					356285	9930180	1
					357285	9930180	1
					358285	9930180	1
					359285	9930180	1
					360285	9930180	1
					361285	9930180	1
					318285	9931180	1
					319285	9931180	1
					320285	9931180	1
					321285	9931180	1
					322285	9931180	1
					323285	9931180	1
					324285	9931180	1
					325285	9931180	1
					326285	9931180	1
					327285	9931180	1
					328285	9931180	1
					329285	9931180	1
					330285	9931180	1
					331285	9931180	1
					332285	9931180	1
					333285	9931180	1
					334285	9931180	1
					335285	9931180	1
					336285	9931180	1
					337285	9931180	1
					338285	9931180	1
					339285	9931180	1
					340285	9931180	1
					341285	9931180	1
					342285	9931180	1
					343285	9931180	1
					344285	9931180	1
					345285	9931180	1
					346285	9931180	1
					347285	9931180	1
					348285	9931180	1
					349285	9931180	1
					350285	9931180	1
					351285	9931180	1
					352285	9931180	1
					353285	9931180	1
					354285	9931180	1
					355285	9931180	1
					356285	9931180	1
					357285	9931180	1
					358285	9931180	1
					359285	9931180	1
					360285	9931180	1
					361285	9931180	1
					318285	9932180	1
					319285	9932180	1
					320285	9932180	1
					321285	9932180	1
					322285	9932180	1
					323285	9932180	1
					324285	9932180	1
					325285	9932180	1
					326285	9932180	1
					327285	9932180	1
					328285	9932180	1
					329285	9932180	1
					330285	9932180	1
					331285	9932180	1
					332285	9932180	1
					333285	9932180	1
					334285	9932180	1
					335285	9932180	1
					336285	9932180	1
					337285	9932180	1
					338285	9932180	1
					339285	9932180	1
					340285	9932180	1
					341285	9932180	1
					342285	9932180	1
					343285	9932180	1
					344285	9932180	1
					345285	9932180	1
					346285	9932180	1
					347285	9932180	1
					348285	9932180	1
					349285	9932180	1
					350285	9932180	1
					351285	9932180	1
					352285	9932180	1
					353285	9932180	1
					354285	9932180	1
					355285	9932180	1
					356285	9932180	1
					357285	9932180	1
					358285	9932180	1
					359285	9932180	1
					360285	9932180	1
					361285	9932180	1
					318285	9933180	1
					319285	9933180	1
					320285	9933180	1
					321285	9933180	1
					322285	9933180	1
					323285	9933180	1
					324285	9933180	1
					325285	9933180	1
					326285	9933180	1
					327285	9933180	1
					328285	9933180	1
					329285	9933180	1
					330285	9933180	1
					331285	9933180	1
					332285	9933180	1
					333285	9933180	1
					334285	9933180	1
					335285	9933180	1
					336285	9933180	1
					337285	9933180	1
					338285	9933180	1
					339285	9933180	1
					340285	9933180	1
					341285	9933180	1
					342285	9933180	1
					343285	9933180	1
					344285	9933180	1
					345285	9933180	1
					346285	9933180	1
					347285	9933180	1
					348285	9933180	1
					349285	9933180	1
					350285	9933180	1
					351285	9933180	1
					352285	9933180	1
					353285	9933180	1
					354285	9933180	1
					355285	9933180	1
					356285	9933180	1
					357285	9933180	1
					358285	9933180	1
					359285	9933180	1
					360285	9933180	1
					361285	9933180	1
					318285	9934180	1
					319285	9934180	1
					320285	9934180	1
					321285	9934180	1
					322285	9934180	1
					323285	9934180	1
					324285	9934180	1
					325285	9934180	1
					326285	9934180	1
					327285	9934180	1
					328285	9934180	1
					329285	9934180	1
					330285	9934180	1
					331285	9934180	1
					332285	9934180	1
					333285	9934180	1
					334285	9934180	1
					335285	9934180	1
					336285	9934180	1
					337285	9934180	1
					338285	9934180	1
					339285	9934180	1
					340285	9934180	1
					341285	9934180	1
					342285	9934180	1
					343285	9934180	1
					344285	9934180	1
					345285	9934180	1
					346285	9934180	1
					347285	9934180	1
					348285	9934180	1
					349285	9934180	1
					350285	9934180	1
					351285	9934180	1
					352285	9934180	1
					353285	9934180	1
					354285	9934180	1
					355285	9934180	1
					356285	9934180	1
					357285	9934180	1
					358285	9934180	1
					359285	9934180	1
					360285	9934180	1
					361285	9934180	1
					318285	9935180	1
					319285	9935180	1
					320285	9935180	1
					321285	9935180	1
					322285	9935180	1
					323285	9935180	1
					324285	9935180	1
					325285	9935180	1
					326285	9935180	1
					327285	9935180	1
					328285	9935180	1
					329285	9935180	1
					330285	9935180	1
					331285	9935180	1
					332285	9935180	1
					333285	9935180	1
					334285	9935180	1
					335285	9935180	1
					336285	9935180	1
					337285	9935180	1
					338285	9935180	1
					339285	9935180	1
					340285	9935180	1
					341285	9935180	1
					342285	9935180	1
					343285	9935180	1
					344285	9935180	1
					345285	9935180	1
					346285	9935180	1
					347285	9935180	1
					348285	9935180	1
					349285	9935180	1
					350285	9935180	1
					351285	9935180	1
					352285	9935180	1
					353285	9935180	1
					354285	9935180	1
					355285	9935180	1
					356285	9935180	1
					357285	9935180	1
					358285	9935180	1
					359285	9935180	1
					360285	9935180	1
					361285	9935180	1
					318285	9936180	1
					319285	9936180	1
					320285	9936180	1
					321285	9936180	1
					322285	9936180	1
					323285	9936180	1
					324285	9936180	1
					325285	9936180	1
					326285	9936180	1
					327285	9936180	1
					328285	9936180	1
					329285	9936180	1
					330285	9936180	1
					331285	9936180	1
					332285	9936180	1
					333285	9936180	1
					334285	9936180	1
					335285	9936180	1
					336285	9936180	1
					337285	9936180	1
					338285	9936180	1
					339285	9936180	1
					340285	9936180	1
					341285	9936180	1
					342285	9936180	1
					343285	9936180	1
					344285	9936180	1
					345285	9936180	1
					346285	9936180	1
					347285	9936180	1
					348285	9936180	1
					349285	9936180	1
					350285	9936180	1
					351285	9936180	1
					352285	9936180	1
					353285	9936180	1
					354285	9936180	1
					355285	9936180	1
					356285	9936180	1
					357285	9936180	1
					358285	9936180	1
					359285	9936180	1
					360285	9936180	1
					361285	9936180	1
					319285	9937180	1
					320285	9937180	1
					321285	9937180	1
					322285	9937180	1
					323285	9937180	1
					324285	9937180	1
					325285	9937180	1
					326285	9937180	1
					327285	9937180	1
					328285	9937180	1
					329285	9937180	1
					330285	9937180	1
					331285	9937180	1
					332285	9937180	1
					333285	9937180	1
					334285	9937180	1
					335285	9937180	1
					336285	9937180	1
					337285	9937180	1
					338285	9937180	1
					339285	9937180	1
					340285	9937180	1
					341285	9937180	1
					342285	9937180	1
					343285	9937180	1
					344285	9937180	1
					345285	9937180	1
					346285	9937180	1
					347285	9937180	1
					348285	9937180	1
					349285	9937180	1
					350285	9937180	1
					351285	9937180	1
					352285	9937180	1
					353285	9937180	1
					354285	9937180	1
					355285	9937180	1
					356285	9937180	1
					357285	9937180	1
					358285	9937180	1
					359285	9937180	1
					360285	9937180	1
					361285	9937180	1
					319285	9938180	1
					320285	9938180	1
					321285	9938180	1
					322285	9938180	1
					323285	9938180	1
					324285	9938180	1
					325285	9938180	1
					326285	9938180	1
					327285	9938180	1
					328285	9938180	1
					329285	9938180	1
					330285	9938180	1
					331285	9938180	1
					332285	9938180	1
					333285	9938180	1
					334285	9938180	1
					335285	9938180	1
					336285	9938180	1
					337285	9938180	1
					338285	9938180	1
					339285	9938180	1
					340285	9938180	1
					341285	9938180	1
					342285	9938180	1
					343285	9938180	1
					344285	9938180	1
					345285	9938180	1
					346285	9938180	1
					347285	9938180	1
					348285	9938180	1
					349285	9938180	1
					350285	9938180	1
					351285	9938180	1
					352285	9938180	1
					353285	9938180	1
					354285	9938180	1
					355285	9938180	1
					356285	9938180	1
					357285	9938180	1
					358285	9938180	1
					359285	9938180	1
					360285	9938180	1
					319285	9939180	1
					320285	9939180	1
					321285	9939180	1
					322285	9939180	1
					323285	9939180	1
					324285	9939180	1
					325285	9939180	1
					326285	9939180	1
					327285	9939180	1
					328285	9939180	1
					329285	9939180	1
					330285	9939180	1
					331285	9939180	1
					332285	9939180	1
					333285	9939180	1
					334285	9939180	1
					335285	9939180	1
					336285	9939180	1
					337285	9939180	1
					338285	9939180	1
					339285	9939180	1
					340285	9939180	1
					341285	9939180	1
					342285	9939180	1
					343285	9939180	1
					344285	9939180	1
					345285	9939180	1
					346285	9939180	1
					347285	9939180	1
					348285	9939180	1
					349285	9939180	1
					350285	9939180	1
					351285	9939180	1
					352285	9939180	1
					353285	9939180	1
					354285	9939180	1
					355285	9939180	1
					356285	9939180	1
					357285	9939180	1
					358285	9939180	1
					359285	9939180	1
					360285	9939180	1
					320285	9940180	1
					321285	9940180	1
					322285	9940180	1
					323285	9940180	1
					324285	9940180	1
					325285	9940180	1
					326285	9940180	1
					327285	9940180	1
					328285	9940180	1
					329285	9940180	1
					330285	9940180	1
					331285	9940180	1
					332285	9940180	1
					333285	9940180	1
					334285	9940180	1
					335285	9940180	1
					336285	9940180	1
					337285	9940180	1
					338285	9940180	1
					339285	9940180	1
					340285	9940180	1
					341285	9940180	1
					342285	9940180	1
					343285	9940180	1
					344285	9940180	1
					345285	9940180	1
					346285	9940180	1
					347285	9940180	1
					348285	9940180	1
					349285	9940180	1
					350285	9940180	1
					351285	9940180	1
					352285	9940180	1
					353285	9940180	1
					354285	9940180	1
					355285	9940180	1
					356285	9940180	1
					357285	9940180	1
					358285	9940180	1
					359285	9940180	1
					321285	9941180	1
					322285	9941180	1
					323285	9941180	1
					324285	9941180	1
					325285	9941180	1
					326285	9941180	1
					327285	9941180	1
					328285	9941180	1
					329285	9941180	1
					330285	9941180	1
					331285	9941180	1
					332285	9941180	1
					333285	9941180	1
					334285	9941180	1
					335285	9941180	1
					336285	9941180	1
					337285	9941180	1
					338285	9941180	1
					339285	9941180	1
					340285	9941180	1
					341285	9941180	1
					342285	9941180	1
					343285	9941180	1
					344285	9941180	1
					345285	9941180	1
					346285	9941180	1
					347285	9941180	1
					348285	9941180	1
					349285	9941180	1
					350285	9941180	1
					351285	9941180	1
					352285	9941180	1
					353285	9941180	1
					354285	9941180	1
					355285	9941180	1
					356285	9941180	1
					357285	9941180	1
					358285	9941180	1
					359285	9941180	1
					321285	9942180	1
					322285	9942180	1
					323285	9942180	1
					324285	9942180	1
					325285	9942180	1
					326285	9942180	1
					327285	9942180	1
					328285	9942180	1
					329285	9942180	1
					330285	9942180	1
					331285	9942180	1
					332285	9942180	1
					333285	9942180	1
					334285	9942180	1
					335285	9942180	1
					336285	9942180	1
					337285	9942180	1
					338285	9942180	1
					339285	9942180	1
					340285	9942180	1
					341285	9942180	1
					342285	9942180	1
					343285	9942180	1
					344285	9942180	1
					345285	9942180	0
					346285	9942180	0
					347285	9942180	0
					348285	9942180	1
					349285	9942180	1
					350285	9942180	1
					351285	9942180	1
					352285	9942180	1
					353285	9942180	1
					354285	9942180	1
					355285	9942180	1
					356285	9942180	1
					357285	9942180	1
					358285	9942180	1
					322285	9943180	1
					323285	9943180	1
					324285	9943180	1
					325285	9943180	1
					326285	9943180	1
					327285	9943180	1
					328285	9943180	1
					329285	9943180	1
					330285	9943180	1
					331285	9943180	1
					332285	9943180	1
					333285	9943180	1
					334285	9943180	1
					335285	9943180	1
					336285	9943180	1
					337285	9943180	1
					338285	9943180	1
					339285	9943180	1
					340285	9943180	1
					341285	9943180	1
					342285	9943180	1
					343285	9943180	1
					344285	9943180	0
					345285	9943180	0
					346285	9943180	0
					347285	9943180	0
					348285	9943180	0
					349285	9943180	1
					350285	9943180	1
					351285	9943180	1
					352285	9943180	1
					353285	9943180	1
					354285	9943180	1
					355285	9943180	1
					356285	9943180	1
					357285	9943180	1
					323285	9944180	1
					324285	9944180	1
					325285	9944180	1
					326285	9944180	1
					327285	9944180	1
					328285	9944180	1
					329285	9944180	1
					330285	9944180	1
					331285	9944180	1
					332285	9944180	1
					333285	9944180	1
					334285	9944180	1
					335285	9944180	1
					336285	9944180	1
					337285	9944180	1
					338285	9944180	1
					339285	9944180	1
					340285	9944180	1
					341285	9944180	1
					342285	9944180	1
					343285	9944180	0
					344285	9944180	0
					345285	9944180	0
					346285	9944180	0
					347285	9944180	0
					348285	9944180	0
					349285	9944180	0
					350285	9944180	1
					351285	9944180	1
					352285	9944180	1
					353285	9944180	1
					354285	9944180	1
					355285	9944180	1
					356285	9944180	1
					325285	9945180	1
					326285	9945180	1
					327285	9945180	1
					328285	9945180	1
					329285	9945180	1
					330285	9945180	1
					331285	9945180	1
					332285	9945180	1
					333285	9945180	1
					334285	9945180	1
					335285	9945180	1
					336285	9945180	1
					337285	9945180	1
					338285	9945180	1
					339285	9945180	1
					340285	9945180	1
					341285	9945180	1
					342285	9945180	1
					343285	9945180	0
					344285	9945180	0
					345285	9945180	0
					346285	9945180	0
					347285	9945180	0
					348285	9945180	0
					349285	9945180	0
					350285	9945180	0
					351285	9945180	1
					352285	9945180	1
					353285	9945180	1
					354285	9945180	1
					355285	9945180	1
					326285	9946180	1
					327285	9946180	1
					328285	9946180	1
					329285	9946180	1
					330285	9946180	1
					331285	9946180	1
					332285	9946180	1
					333285	9946180	1
					334285	9946180	1
					335285	9946180	1
					336285	9946180	0
					337285	9946180	0
					338285	9946180	0
					339285	9946180	0
					340285	9946180	0
					341285	9946180	0
					342285	9946180	0
					343285	9946180	0
					344285	9946180	0
					345285	9946180	0
					346285	9946180	0
					347285	9946180	0
					348285	9946180	0
					349285	9946180	0
					350285	9946180	0
					351285	9946180	0
					352285	9946180	0
					353285	9946180	0
					329285	9947180	1
					330285	9947180	1
					331285	9947180	1
					332285	9947180	1
					333285	9947180	1
					334285	9947180	0
					335285	9947180	0
					336285	9947180	0
					337285	9947180	0
					338285	9947180	0
					339285	9947180	0
					340285	9947180	0
					341285	9947180	0
					342285	9947180	0
					343285	9947180	0
					344285	9947180	0
					345285	9947180	0
					346285	9947180	0
					347285	9947180	0
					348285	9947180	0
					349285	9947180	0
					350285	9947180	0
[truncated: 53 more columns]

## Sheet: Data for CAPTURE
Matrices for estimating jaguar population size with program CAPTURE
Lorocachi site
J-01	1	0	0	0	0	1	1	1	0	0	0	0	0	0	0	0	0	0	0	0	0	1	0	0	0	0	0	0	0	0
J-02	1	0	0	0	1	0	0	0	0	0	0	0	0	0	0	0	0	0	0	0	0	0	0	0	0	0	0	0	0	0
J-03	0	0	0	0	0	0	0	1	0	0	0	0	0	0	0	0	0	0	0	0	0	0	0	0	0	0	0	0	0	0
J-04	0	1	0	0	0	0	0	0	0	0	0	0	0	0	0	0	0	0	0	0	0	0	1	0	0	0	0	0	0	0
J-05	0	0	0	0	0	1	0	0	0	1	1	0	0	0	0	0	0	0	0	0	0	0	0	0	0	0	0	0	0	1
J-06	0	0	1	0	0	0	0	0	1	0	0	1	0	0	0	0	0	0	0	0	0	0	0	0	0	1	0	0	0	1
J-07	0	0	0	0	0	0	0	0	1	0	0	0	0	0	0	0	0	0	0	0	0	0	0	0	0	0	0	0	0	0
J-08	0	0	0	0	0	0	0	1	0	0	0	0	0	0	0	0	0	1	0	0	0	0	0	0	0	0	0	0	0	0
J-09	0	0	0	0	0	0	0	0	0	0	0	0	0	0	1	0	1	0	1	0	0	0	0	0	0	0	0	0	1	0
J-10	0	0	0	0	0	0	0	0	0	0	0	0	0	0	0	0	0	0	0	0	0	0	0	0	0	0	0	1	0	0
J-11	0	0	0	0	0	0	0	0	0	0	0	0	0	0	1	0	0	0	0	0	0	0	0	0	0	0	0	0	0	0
J-12	0	0	0	0	0	0	0	0	0	0	0	0	0	0	0	0	0	0	0	0	0	0	1	0	0	0	0	0	0	0
J-13	0	0	0	0	0	0	0	0	1	0	0	0	0	0	0	0	0	0	0	0	0	0	0	0	0	0	0	0	0	0
Tiputini site
J-1	0	0	0	0	0	0	0	0	0	0	0	0	1	0	0	0	0	1	0	0	0	0	0	0	0	0	0	0	0	0
J-2	1	0	0	0	0	0	0	0	0	0	0	0	0	0	0	0	0	0	0	0	0	0	0	0	0	0	0	0	0	0
J-3	0	0	0	0	0	0	0	0	0	0	0	0	0	0	0	0	1	0	0	0	0	0	0	0	0	0	0	0	0	0
J-4	0	0	0	0	0	0	0	0	0	0	0	0	0	0	0	0	0	0	0	0	0	0	0	0	0	0	1	1	0	0
J-5	0	0	0	0	0	0	0	0	0	0	0	0	0	0	0	0	0	0	0	0	0	0	1	0	0	0	0	0	0	0
J-6	0	0	0	0	0	0	0	0	0	0	0	0	0	0	0	0	0	0	0	0	0	0	0	0	0	0	0	0	0	1
Keweriono site
J-1	0	0	1	0	0	0	0	0	0	0	0	0	0	0	0	0	1	0	0	0	0	1	0	0	0	0	0	0	0	0
J-3	0	0	0	0	0	0	0	0	0	0	0	0	0	0	0	0	0	0	0	0	0	0	0	0	1	0	0	1	0	1
J-4	0	0	0	0	0	0	0	0	0	0	1	0	0	0	0	0	0	0	1	0	0	0	0	0	0	0	0	0	0	0
J-5	1	0	0	0	0	0	0	0	0	0	1	0	0	0	0	0	0	0	1	0	0	0	0	0	0	0	0	0	0	0
J-6	0	0	0	0	0	0	0	0	0	0	0	0	0	0	0	0	1	0	0	0	0	0	0	0	0	0	0	0	0	0
J-7	0	0	0	0	0	0	0	0	0	0	0	0	1	0	0	0	0	0	0	0	0	0	0	0	0	0	0	0	0	0
J-8	0	0	0	0	0	0	0	0	1	0	0	0	0	0	0	0	0	0	0	0	0	0	0	0	0	0	0	0	0	0
J-9	0	0	0	0	0	0	0	0	0	0	0	0	0	0	0	0	0	0	0	0	0	0	0	0	0	1	0	0	0	0
Maxus Road site
J-1	1	0	0	0	0	0	0	0	0	0	0	0	0	1	0	0	0	0	0	0	0	0	0	0	0	0	0	0	0	0
J-2	0	0	0	0	0	0	0	0	0	1	0	0	0	0	0	0	0	0	0	0	0	0	0	0	0	0	0	1	1	0
J-3	0	0	0	0	0	0	0	0	1	0	0	0	0	0	0	0	0	0	0	0	1	0	0	0	0	0	0	0	0	0
